# Supplementary material for: Projecting ancient ancestry in modern-day Arabians and Iranians: a key role of the past exposed Arabo-Persian Gulf on human migrations
Source: bioRxiv or medRxiv preprint supplement (doi:10.1101/2021.02.24.432678), 2021-02-25
Supplement: Supplementary file [file media-1.pdf]

## Projecting ancient ancestry in modern-day Arabians and Iranians: a key role of the past exposed Arabo-Persian Gulf on human migrations

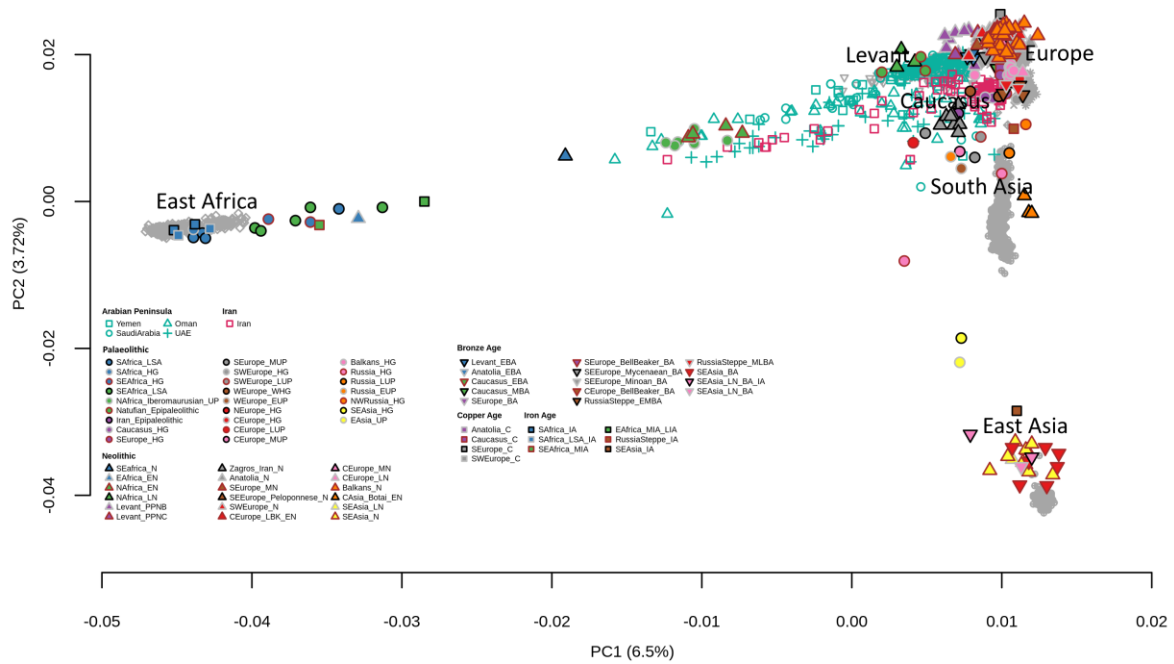

**Supplemental Figure 1:** Principal components analysis of present-day samples from the Arabian Peninsula (blue), Iran (red) and neighbouring populations (grey, to avoid visual clutter) with projected ancient samples in different colours and formats according to the legend. Abbreviations are as follows: E, Early; M, Middle; L, Late; HG, hunter-gatherer; N, Neolithic; C, Chalcolithic; BA, Bronze Age; IA, Iron Age; UP, upper Palaeolithic; EPI, Epipaleolithic.

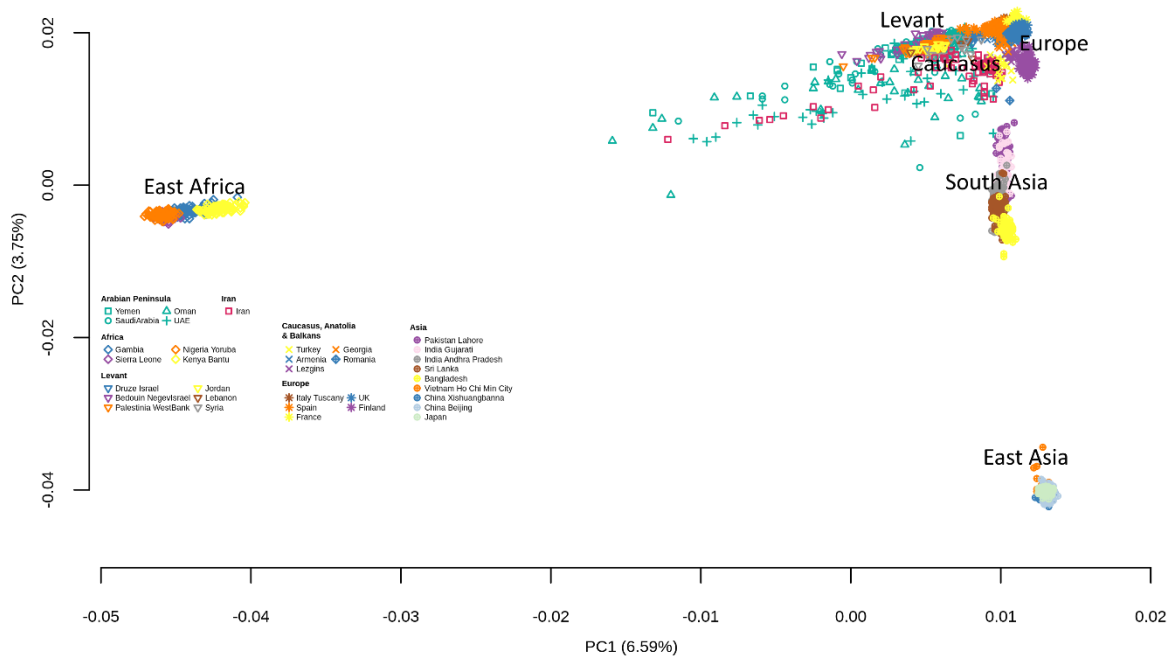

**Supplemental Figure 2:** Principal components analysis of present-day individuals.

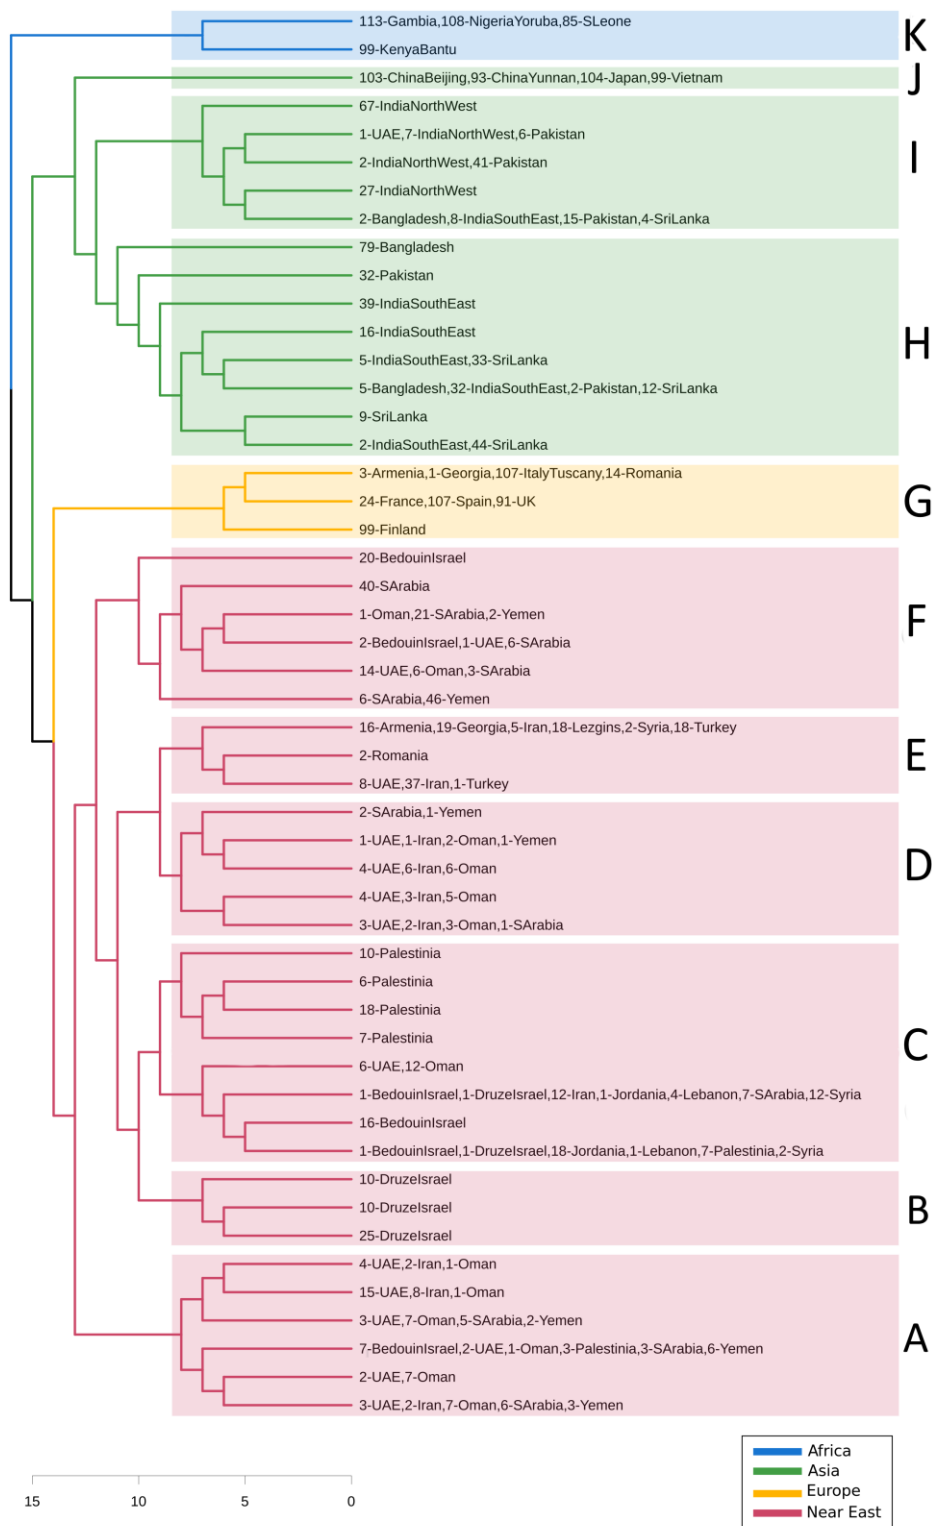

**Supplemental Figure 3:** Hierarchical clustering tree from which were clusters based on sample geographical locations were inferred.

# Iran

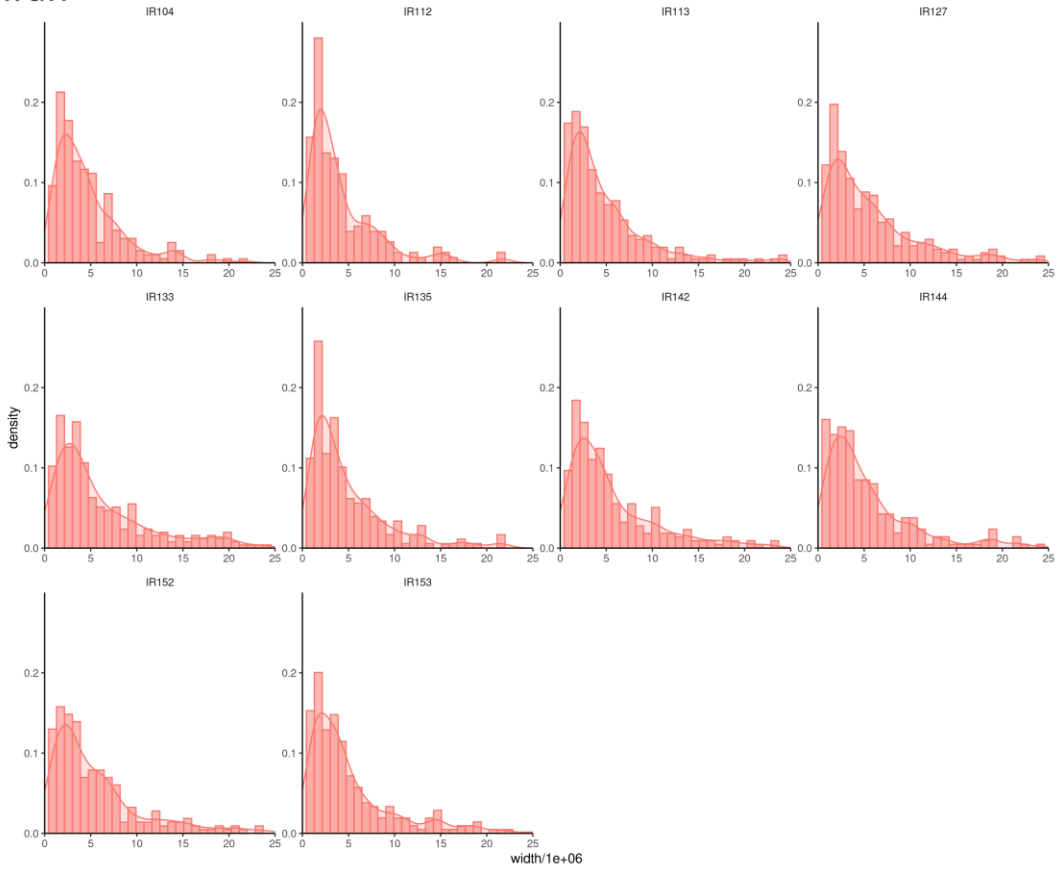

# Oman

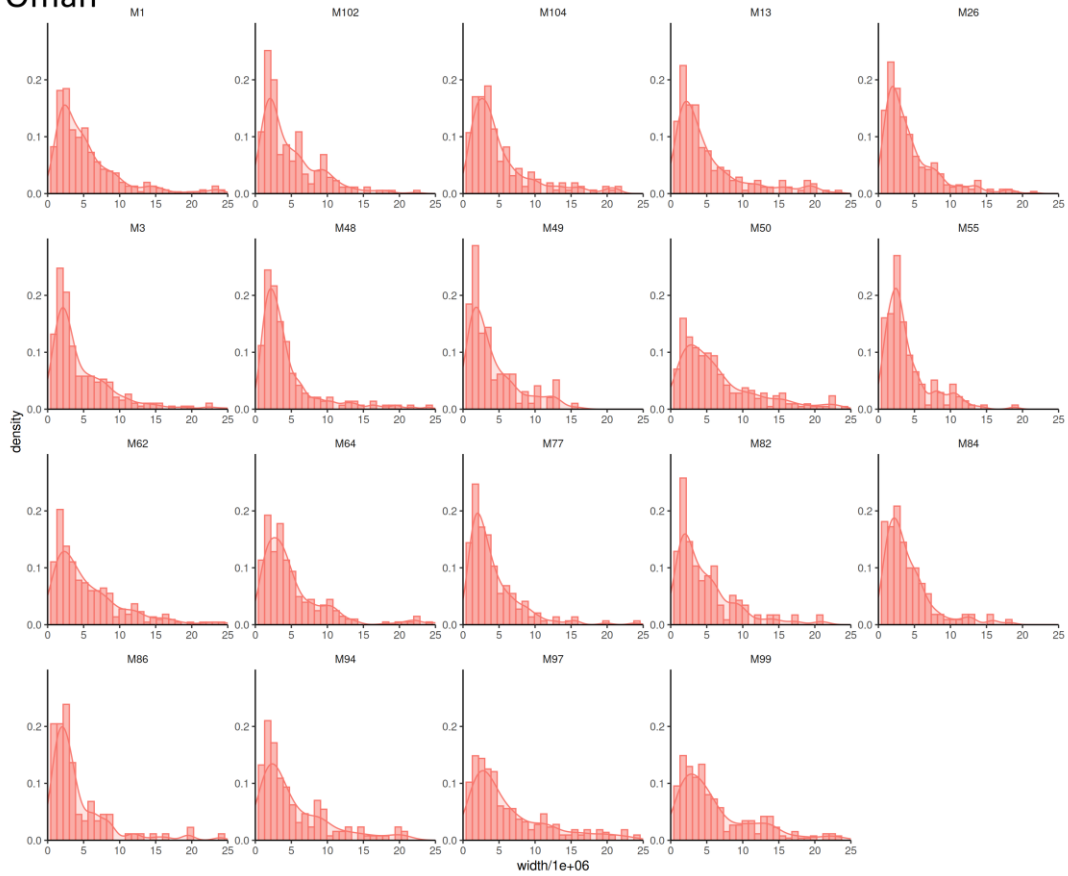

# UAE

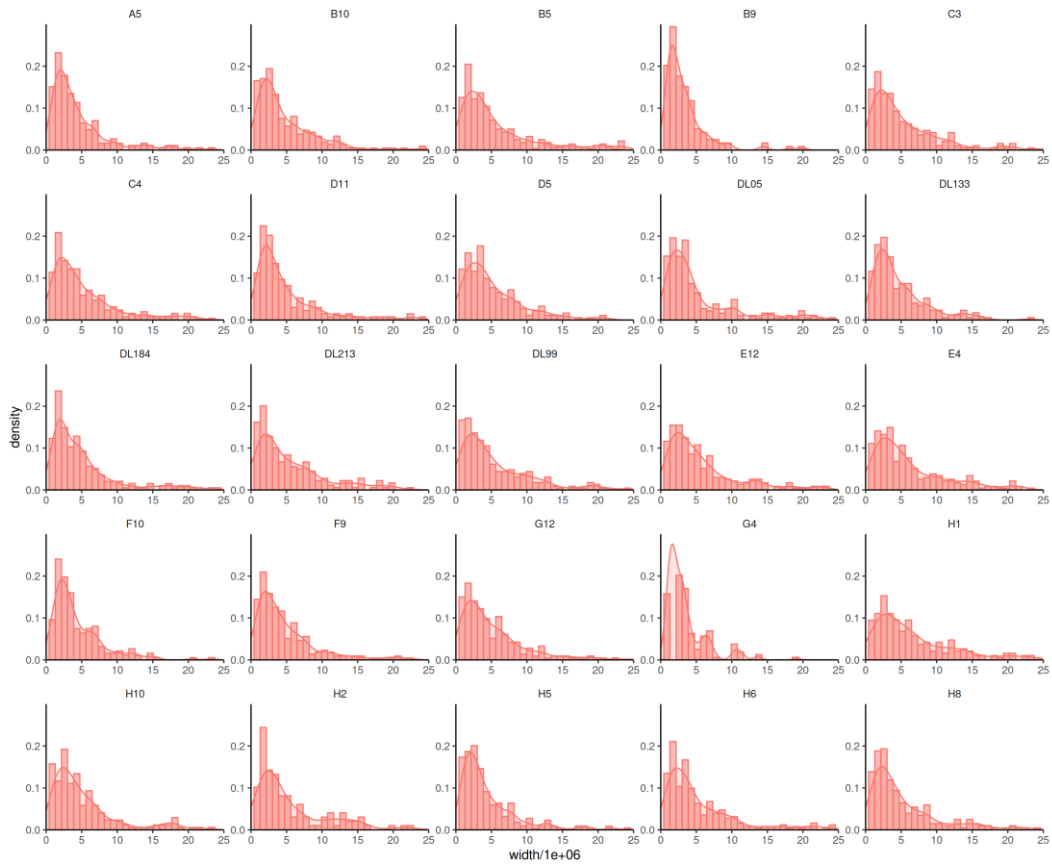

# Saudi Arabia

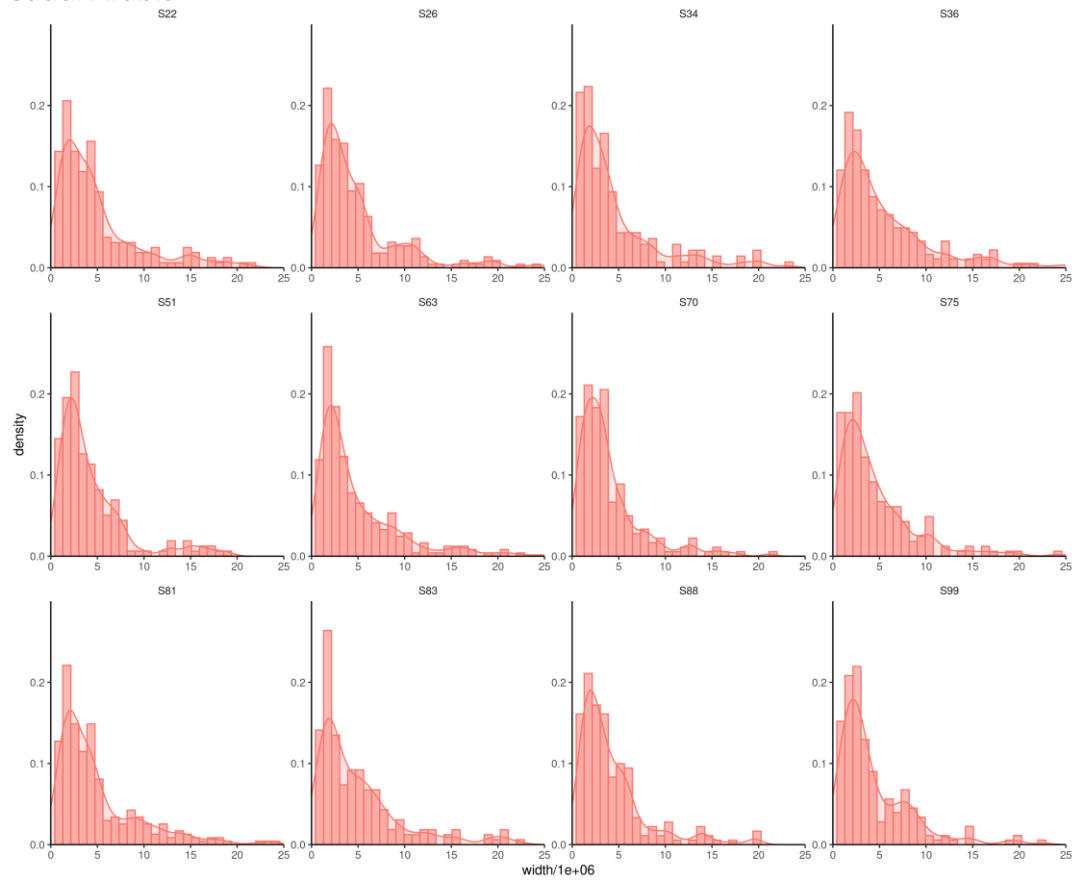

# Yemen

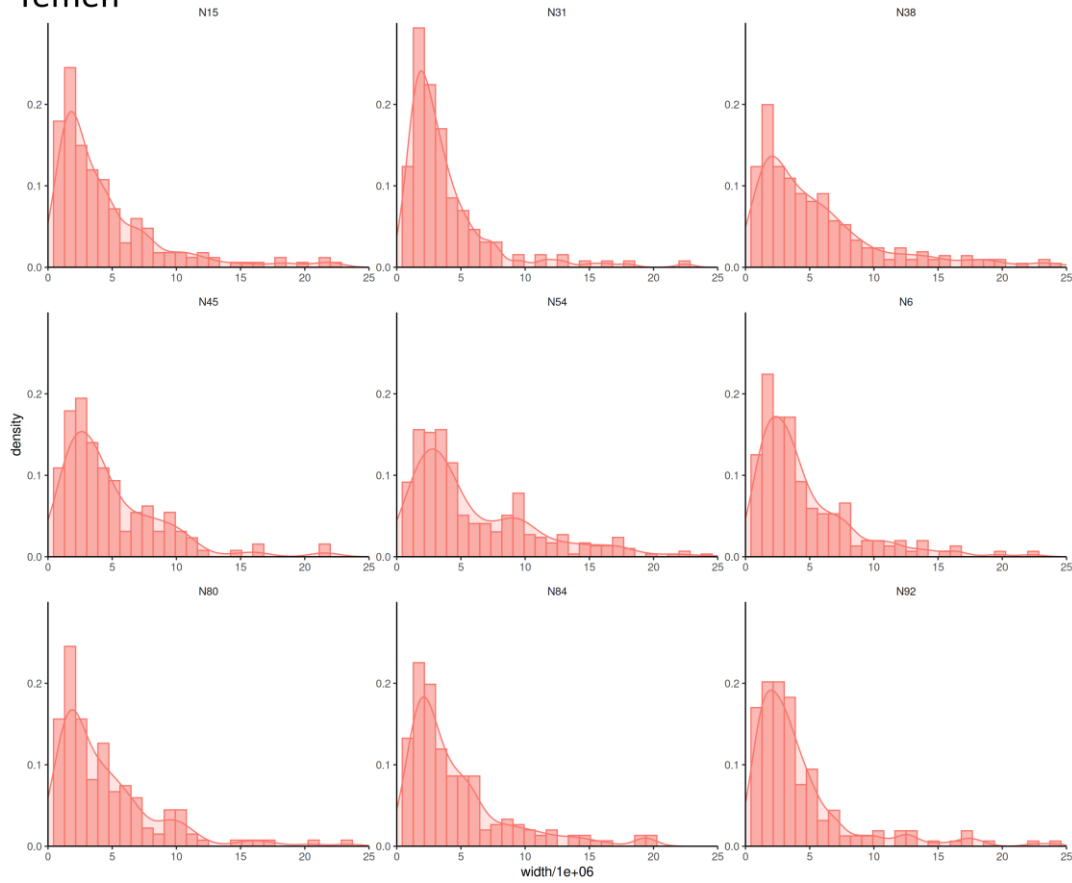

**Supplemental Figure 4:** Median sizes (in cM) of the sub-Saharan African blocks estimated per AP and Iranian individuals affiliated in cluster A.

# Iran

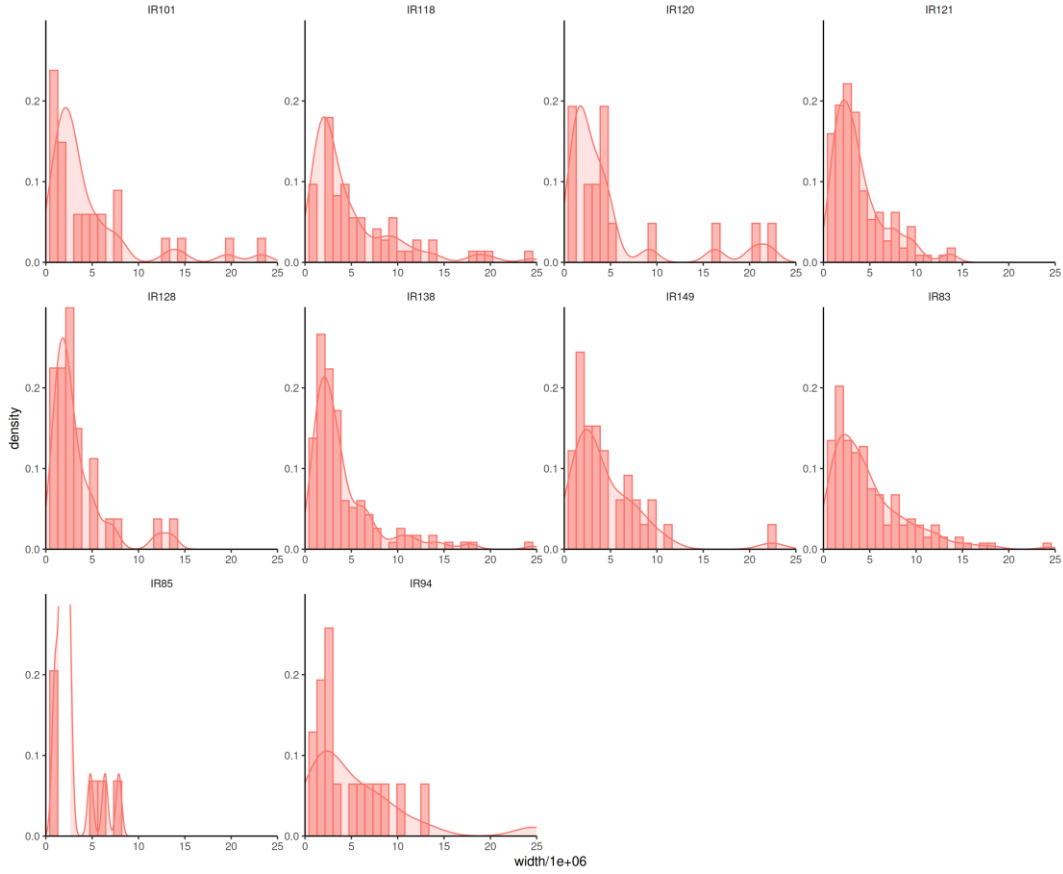

# Oman

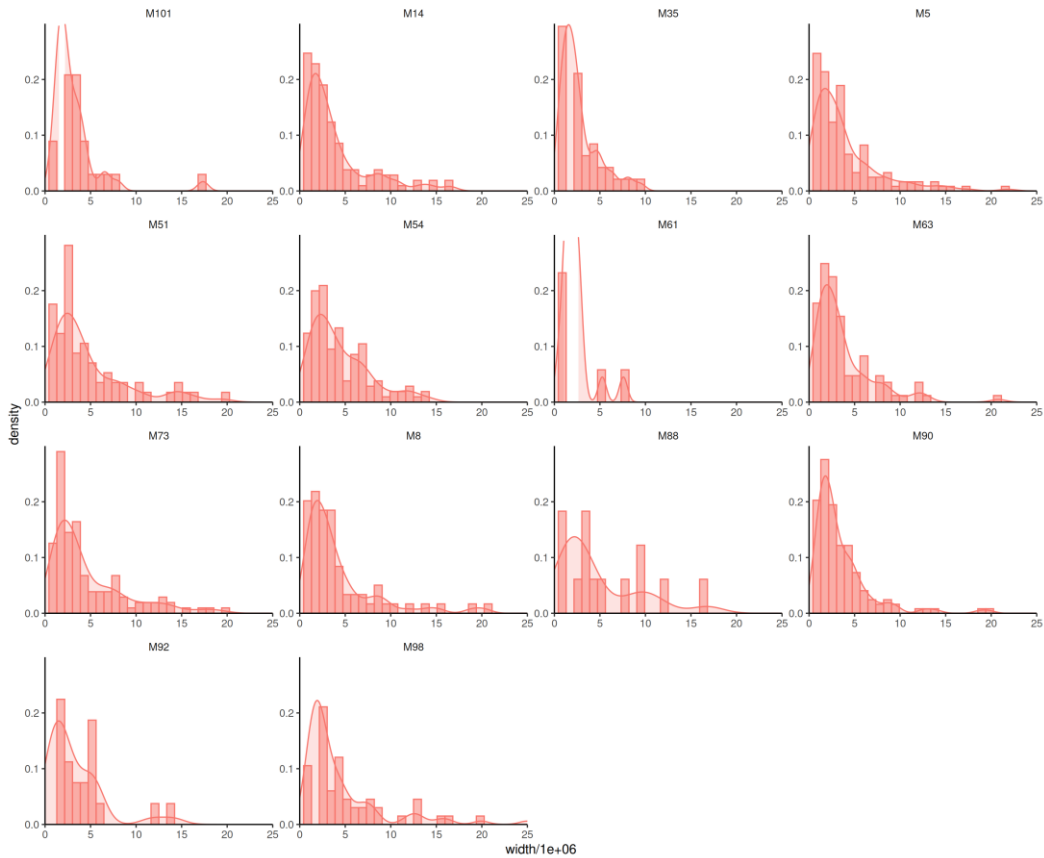

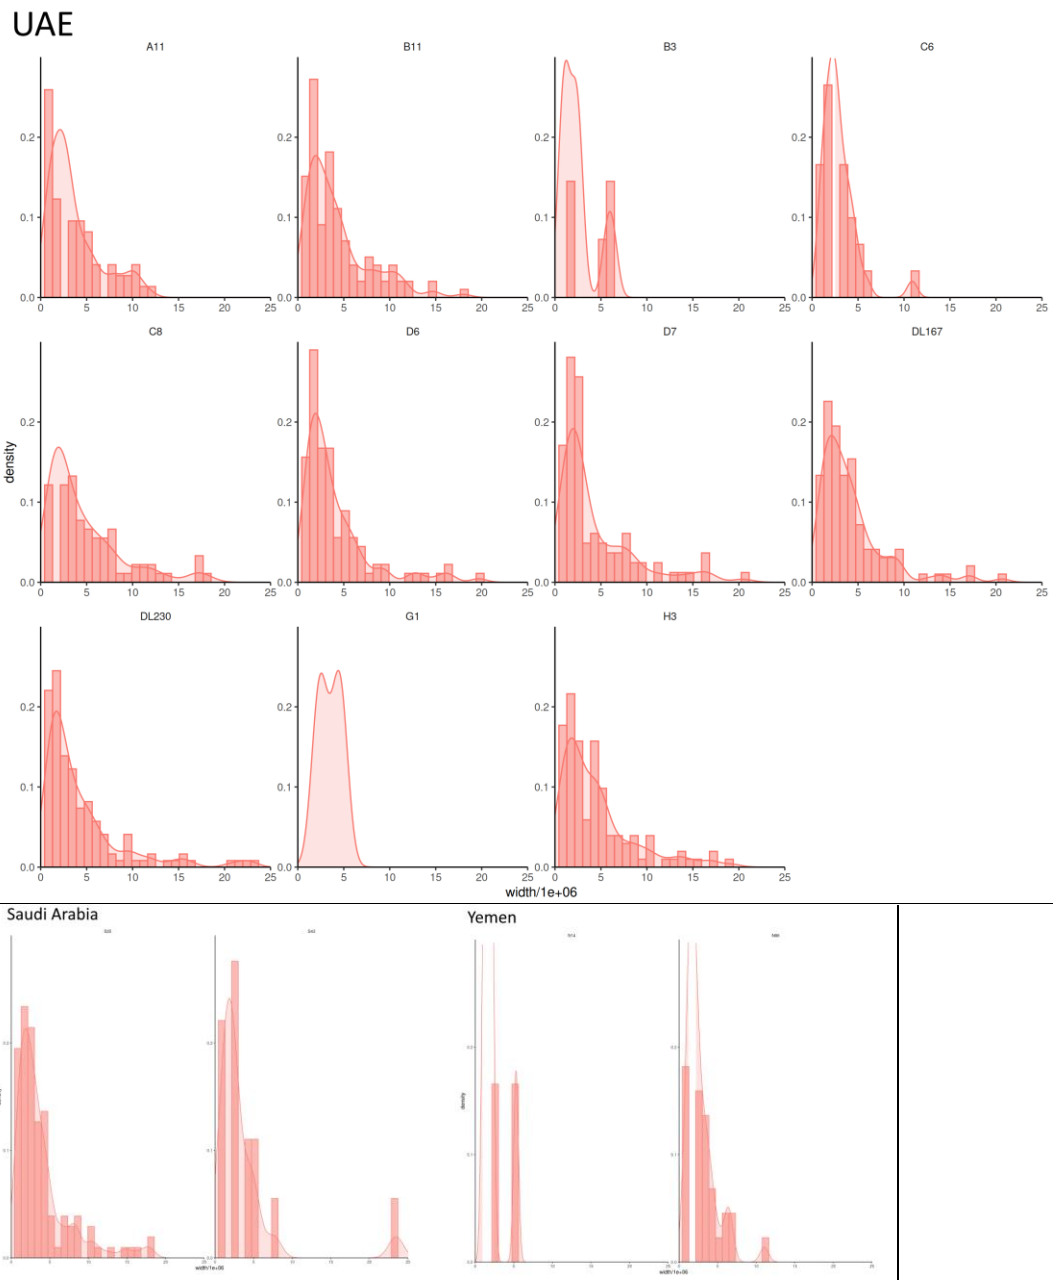

**Supplemental Figure 5:** Median sizes (in cM) of the sub-Saharan African blocks estimated per AP and Iranian individuals affiliated in cluster D.



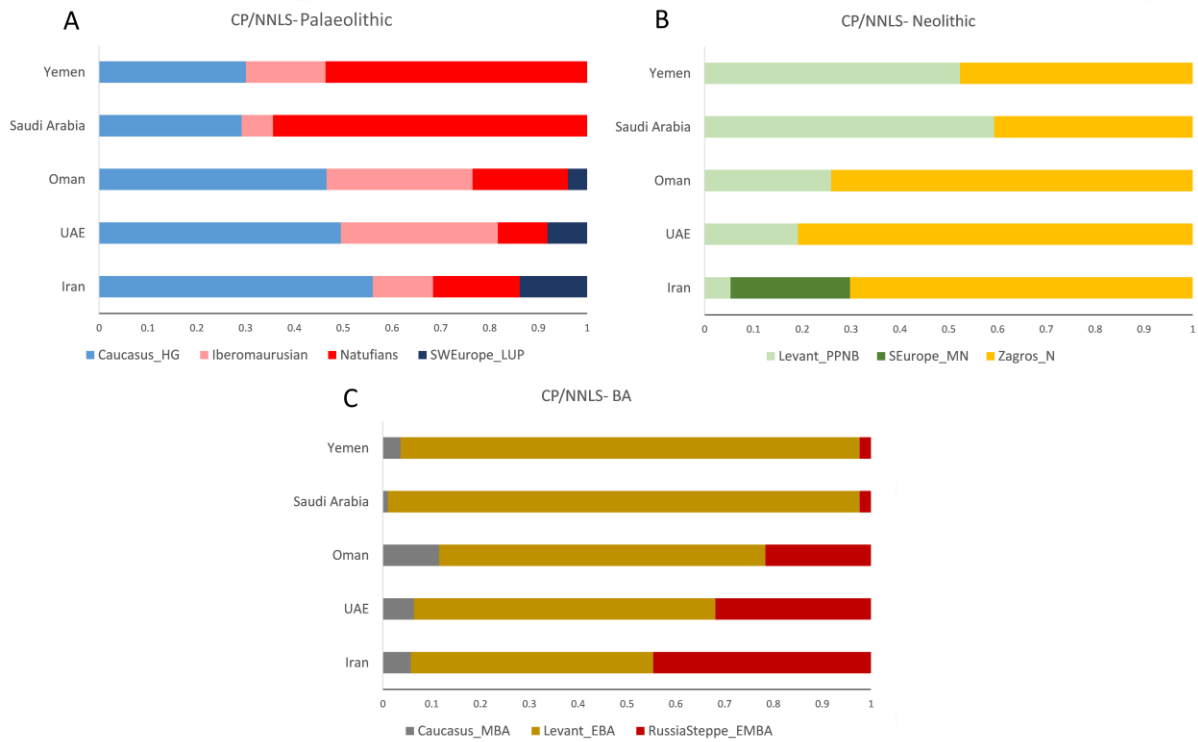

**Supplemental Figure 6:** Population-based ancestry estimates for all the modern populations inferred by CHROMOPAINTER via an NNLS-based analysis. A, Palaeolithic period; B, Neolithic period; C, Bronze age period. Abbreviations are as follows: E, Early; M, Middle; L, Late; HG, hunter-gatherer; N, Neolithic; BA, Bronze Age; UP, upper Palaeolithic.

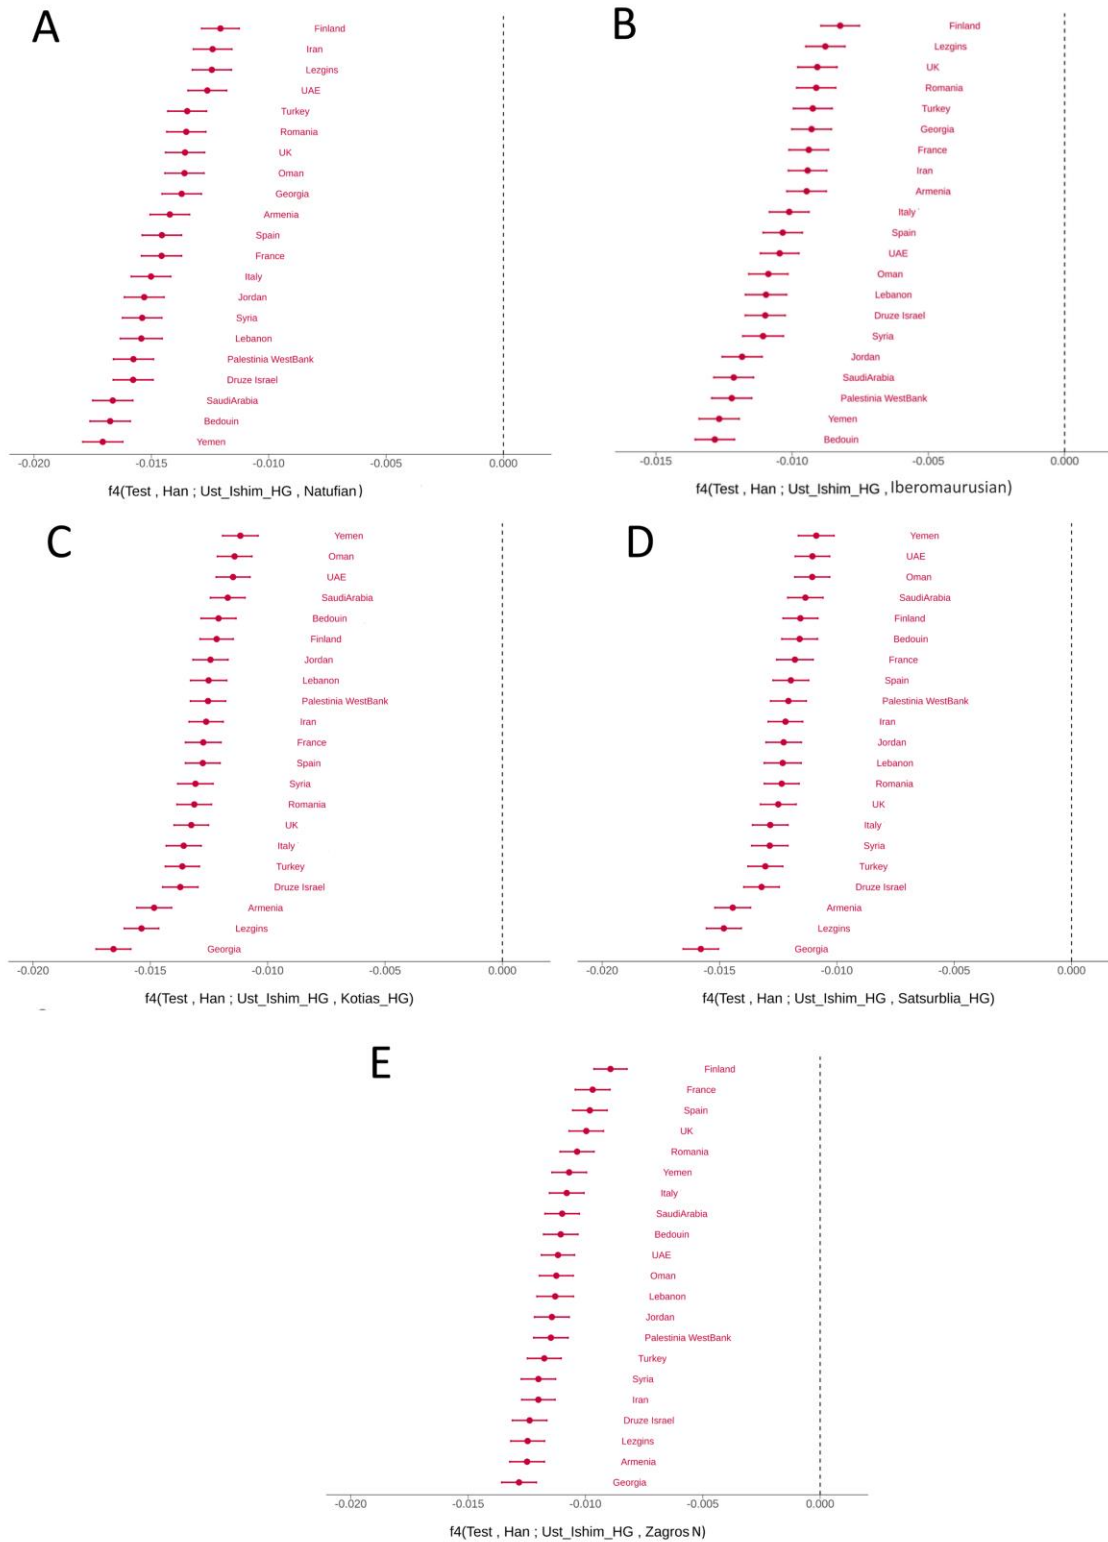

**Supplemental Figure 7:** Alternative testing of the statistic  $f_4(\text{Test, Han; Ust'-Ishim, X})$ , where Ust'-Ishim and X were used as proxies for non-basal and basal Eurasian lineage, respectively. The X was a rather recent ancient specimen of admixed basal Eurasian ancestry:

Levant pre-Neolithic Natufian (A); North Africa Iberomaurusian (B) Caucasus Kotias hunter-gatherer (C); Caucasus Satsurblia hunter-gatherer (D); and Iranian Zagros (E) farmer. The bullet identifies significantly negative values ( $Z$ -score  $< -3$ ). All the tested samples were modern populations.

**Table S1:** Modern samples used in this study.

| Country              | Region            | N. of Samples | Latitude | Longitude | Reference                                                                                                                                                      |
|----------------------|-------------------|---------------|----------|-----------|----------------------------------------------------------------------------------------------------------------------------------------------------------------|
| Armenia              | Caucasus          | 19            | 40.11    | 44.31     | Behar et al. (2010) doi: 10.1038/nature09103 and Yunusbayev et al. (2012) doi:10.1093/molbev/msr221                                                            |
| Bangladesh           | South Asia        | 87            | 23.42    | 90.21     | 1000 Genomes Project Consortium (2015) doi:10.1038/nature15393                                                                                                 |
| Bedouin              | Levant            | 48            | 30.5     | 34.91     | Patterson et al. (2012) doi: 10.1534/genetics.112.145037 and Lazaridis et al. (2014) doi: 10.1038/nature13673                                                  |
| China Beijing        | East Asia         | 103           | 39.55    | 116.23    | 1000 Genomes Project Consortium (2015) doi: 10.1038/nature15393                                                                                                |
| China Xishuangbanna  | East Asia         | 99            | 22       | 100.48    | 1000 Genomes Project Consortium (2015) doi: 10.1038/nature15393                                                                                                |
| Druze Israel         | Levant            | 47            | 32.57    | 35.1      | Patterson et al. (2012) doi: 10.1534/genetics.112.145037; Haber et al. (2016) doi: 10.1038/ejhg.2015.206 and Lazaridis et al. (2014) doi: 10.1038/nature13673  |
| Finland              | North Europe      | 100           | 60.1     | 24.56     | 1000 Genomes Project Consortium (2015) doi: 10.1038/nature15393                                                                                                |
| France               | West Europe       | 24            | 48.51    | 2.21      | Patterson et al. (2012) doi: 10.1534/genetics.112.145037 and Lazaridis et al. (2014) doi: 10.1038/nature13673                                                  |
| Gambia               | West Africa       | 113           | 13.28    | -16.36    | 1000 Genomes Project Consortium (2015) doi: 10.1038/nature15393                                                                                                |
| Georgia              | Caucasus          | 20            | 41.43    | 44.47     | Yunusbayev et al. (2012) doi:10.1093/molbev/msr221 and Behar et al. (2010) doi: 10.1038/nature09103                                                            |
| India Andhra Pradesh | South Asia        | 103           | 16.5     | 80.64     | 1000 Genomes Project Consortium (2015) doi: 10.1038/nature15393                                                                                                |
| India Gujarati       | South Asia        | 106           | 23.13    | 72.41     | 1000 Genomes Project Consortium (2015) doi: 10.1038/nature15393                                                                                                |
| Iran                 | Iran              | 100           | 35.41    | 51.25     | Fernandes et al. (2019) doi:10.1093/molbev/msz005; Behar et al. (2013) doi:10.3378/027.085.0604 and Yunusbayev et al. (2015) doi: 10.1371/journal.pgen.1005068 |
| Italy                | South Europe      | 108           | 43.46    | 11.15     | 1000 Genomes Project Consortium (2015) doi: 10.1038/nature15393                                                                                                |
| Japan                | East Asia         | 105           | 35.41    | 139.46    | 1000 Genomes Project Consortium (2015) doi: 10.1038/nature15393                                                                                                |
| Jordan               | Levant            | 20            | 31.57    | 35.56     | Patterson et al. (2012) doi: 10.1534/genetics.112.145037 and Lazaridis et al. (2014) doi: 10.1038/nature13673                                                  |
| Kenya                | East Africa       | 111           | 0.37     | 34.46     | 1000 genomes Project Consortium (2015) doi: 10.1038/nature15393                                                                                                |
| Lebanon              | Levant            | 7             | 33.54    | 35.32     | Behar et al. (2010) doi: 10.1038/nature09103                                                                                                                   |
| Lezgins              | Caucasus          | 18            | 43.06    | 46.53     | Behar et al. (2010) doi: 10.1038/nature09103 and Behar et al. (2013) doi:10.3378/027.085.0604                                                                  |
| Nigeria Yoruba       | West Africa       | 110           | 7.23     | 3.55      | 1000 Genomes Project Consortium (2015) doi: 10.1038/nature15393                                                                                                |
| Oman                 | Arabian Peninsula | 100           | 23.36    | 58.33     | Fernandes et al (2019) doi:10.1093/molbev/msz005                                                                                                               |
| Pakistan Lahore      | South Asia        | 97            | 31.32    | 74.2      | 1000 Genomes Project Consortium (2015) doi: 10.1038/nature15393                                                                                                |
| Palestina WestBank   | Levant            | 51            | 31.47    | 35.13     | Patterson et al. (2012) doi: 10.1534/genetics.112.145037 and Lazaridis et al. (2014) doi: 10.1038/nature13673                                                  |
| Romania              | Balkans           | 16            | 44.25    | 26.06     | Behar et al. (2010) doi: 10.1038/nature09103                                                                                                                   |
| Saudi Arabia         | Arabian           | 120           | 24.39    | 46.46     | Fernandes et al. (2019) doi:10.1093/molbev/msz005                                                                                                              |

|              |                   |     |       |        |                                                                 |
|--------------|-------------------|-----|-------|--------|-----------------------------------------------------------------|
|              | Peninsula         |     |       |        |                                                                 |
| Sierra Leone | West Africa       | 86  | 8.29  | -13.14 | 1000 Genomes Project Consortium (2015) doi: 10.1038/nature15393 |
| Spain        | Southwest Europe  | 107 | 40.26 | -3.42  | 1000 Genomes Project Consortium (2015) doi: 10.1038/nature15393 |
| Sri Lanka    | South Asia        | 105 | 6.56  | 79.52  | 1000 Genomes Project Consortium (2015) doi: 10.1038/nature15393 |
| Syria        | Levant            | 16  | 33.3  | 36.18  | Behar et al. (2010) doi: 10.1038/nature09103                    |
| Turkey       | Anatolia          | 19  | 39.56 | 32.52  | Behar et al. (2010) doi: 10.1038/nature09103                    |
| UAE          | Arabian Peninsula | 120 | 25.15 | 55.17  | Fernandes et al. (2019) doi:10.1093/molbev/msz005               |
| UK           | Northwest Europe  | 93  | 51.3  | -0.7   | 1000 Genomes Project Consortium (2015) doi: 10.1038/nature15393 |
| Vietnam      | South Asia        | 101 | 10.48 | 106.39 | 1000 Genomes Project Consortium (2015) doi: 10.1038/nature15393 |
| Yemen        | Arabian Peninsula | 61  | 15.2  | 44.12  | Fernandes et al. (2019) doi:10.1093/molbev/msz005               |

**Table S2:** Ancient samples used in this study.

| SampleID            | Group ID       | Country      | Time Period  | Average of 95.4% date range in calBP (defined as 1950 CE) | Sex | Latitude | Longitude | Publication                                                | Analysis                                                       |
|---------------------|----------------|--------------|--------------|-----------------------------------------------------------|-----|----------|-----------|------------------------------------------------------------|----------------------------------------------------------------|
| AfontovaGora3_d     | Russia_LUP     | Russia       | Palaeolithic | 17930                                                     | F   | 56.02    | 92.87     | Fu et al. (2016) doi: 10.1038/nature17993                  | PCA, Admixture                                                 |
| AH1.SG              | Zagros_N       | Iran         | Neolithic    | 9900                                                      | F   | 34.19    | 48.37     | Broushaki et al. (2016) doi: 10.1126/science.aaf7943       | PCA, Admixture                                                 |
| AH2.SG              | Zagros_N       | Iran         | Neolithic    | 9931                                                      | M   | 34.19    | 48.37     | Broushaki et al. (2016) doi: 10.1126/science.aaf7943       | PCA, Admixture                                                 |
| AH4.SG              | Zagros_N       | Iran         | Neolithic    | 9930                                                      | F   | 34.19    | 48.37     | Broushaki et al. (2016) doi: 10.1126/science.aaf7943       | PCA, Admixture,                                                |
| ANI159-ANI181       | Balkans_N      | Bulgaria     | Neolithic    | 6571                                                      | M   | 43.21    | 27.86     | Mathieson et al. (2018) doi: 10.1038/nature25778           | PCA, Admixture,                                                |
| ANI160              | Balkans_N      | Bulgaria     | Neolithic    | 6550                                                      | M   | 43.21    | 27.86     | Mathieson et al. (2018) doi: 10.1038/nature25778           | PCA, Admixture,                                                |
| ANI163              | Balkans_N      | Bulgaria     | Neolithic    | 6577                                                      | F   | 43.21    | 27.86     | Mathieson et al. (2018) doi: 10.1038/nature25778           | PCA, Admixture,                                                |
| atp002.SG           | SWEurope_C     | Spain        | Copper Age   | 4740                                                      | M   | 42.35    | -3.52     | Valdiosera et al. (2018) doi: 10.1073/pnas.1717762115      | PCA, Admixture,                                                |
| atp005.SG           | SWEurope_N     | Spain        | Neolithic    | 7074                                                      | M   | 42.35    | -3.52     | Valdiosera et al. (2018) doi: 10.1073/pnas.1717762115      | PCA, Admixture,                                                |
| atp12-1420.SG       | SWEurope_C     | Spain        | Copper Age   | 4896                                                      | M   | 42.35    | -3.52     | Valdiosera et al. (2018) doi: 10.1073/pnas.1717762115      | PCA, Admixture,                                                |
| baa001.SG           | SAfrica_LSA    | South Africa | Palaeolithic | 1909                                                      | M   | 29.32    | 31.13     | Schlebusch et al. (2017) doi: 10.1126/science.aao6266      | PCA, Admixture,                                                |
| bab001.SG           | SAfrica_LSA    | South Africa | Palaeolithic | 2041                                                      | M   | 29.32    | 31.13     | Schlebusch et al. (2017) doi: 10.1126/science.aao6266      | PCA, Admixture,                                                |
| Bar31.SG            | Anatolia_N     | Turkey       | Neolithic    | 8279                                                      | M   | 40.30    | 29.57     | Hofmanova et al. (2016) doi: 10.1073/pnas.1523951113       | PCA, Admixture,                                                |
| Bar8.SG             | Anatolia_N     | Turkey       | Neolithic    | 8071                                                      | F   | 40.30    | 29.57     | Hofmanova et al. (2016) doi: 10.1073/pnas.1523951113       | PCA, Admixture, NNLS,                                          |
| Bichon.SG           | CEurope_HG     | Switzerland  | Palaeolithic | 13665                                                     | M   | 47.10    | 6.87      | Jones et al. (2015) doi: 10.1038/ncomms9912                | PCA, Admixture, NNLS, Right-pop in qpWave and qpAdm (Outgroup) |
| Bon001.SG           | Anatolia_N     | Turkey       | Neolithic    | 10032                                                     | M   | 37.75    | 32.86     | Kilinc et al. (2016) doi: 10.1016/j.cub.2016.07.057        | PCA, Admixture,                                                |
| Bon002.SG           | Anatolia_N     | Turkey       | Neolithic    | 10078                                                     | F   | 37.75    | 32.86     | Kilinc et al. (2016) doi: 10.1016/j.cub.2016.07.057        | PCA, Admixture,                                                |
| Bon004.SG           | Anatolia_N     | Turkey       | Neolithic    | 10076                                                     | M   | 37.75    | 32.86     | Kilinc et al. (2016) doi: 10.1016/j.cub.2016.07.057        | PCA, Admixture,                                                |
| BOT14.SG            | CAsia_Botai_EN | Kazakhstan   | Neolithic    | 5264                                                      | M   | 53.31    | 67.65     | Damgaard et al. (2018) doi: 10.1126/science.aar7711        | PCA, Admixture,                                                |
| BOT15.SG            | CAsia_Botai_EN | Kazakhstan   | Neolithic    | 5135                                                      | M   | 53.31    | 67.65     | Damgaard et al. (2018) doi: 10.1126/science.aar7711        | PCA, Admixture,                                                |
| BOT2016.SG          | CAsia_Botai_EN | Kazakhstan   | Neolithic    | 5450                                                      | F   | 53.31    | 67.65     | Damgaard et al. (2018) doi: 10.1126/science.aar7711        | PCA, Admixture,                                                |
| c40331.SG           | SWEurope_N     | Spain        | Neolithic    | 5650                                                      | M   | 37.36    | -4.25     | Valdiosera et al. (2018) doi: 10.1073/pnas.1717762115      | PCA, Admixture,                                                |
| CabecoArruda117B.SG | SWEurope_N     | Portugal     | Neolithic    | 5050                                                      | M   | 39.11    | -8.66     | Martiniano et al. (2017) doi: 10.1371/journal.pgen.1006852 | PCA, Admixture,                                                |

|                         |                       |              |                      |       |   |       |        |                                                                                                                                                                                                        |                                                                 |
|-------------------------|-----------------------|--------------|----------------------|-------|---|-------|--------|--------------------------------------------------------------------------------------------------------------------------------------------------------------------------------------------------------|-----------------------------------------------------------------|
| CabecoArruda122A.SG     | SWEurope_N            | Portugal     | Neolithic            | 5050  | M | 39.11 | -8.66  | Martiniano et al. (2017) doi: 10.1371/journal.pgen.1006852                                                                                                                                             | PCA, Admixture,                                                 |
| CB13.SG                 | SWEurope_N            | Spain        | Neolithic            | 7348  | F | 41.37 | 1.89   | Olalde et al. (2015) doi: 10.1093/molbev/msv181                                                                                                                                                        | PCA, Admixture,                                                 |
| cha001.SG               | SAfrica_LSA_IA        | South Africa | Iron Age             | 365   | F | 29.09 | 29.33  | Schlebusch et al. (2017) doi: 10.1126/science.aao6266                                                                                                                                                  | PCA, Admixture,                                                 |
| CovaMoura364.SG         | SWEurope_N            | Portugal     | Neolithic            | 4900  | M | 38.75 | -9.22  | Martiniano et al. (2017) doi: 10.1371/journal.pgen.1006852                                                                                                                                             | PCA, Admixture,                                                 |
| CovaMoura9B.SG          | SWEurope_N            | Portugal     | Neolithic            | 4900  | F | 38.75 | -9.22  | Martiniano et al. (2017) doi: 10.1371/journal.pgen.1006852                                                                                                                                             | PCA, Admixture,                                                 |
| DA38.SG                 | CAsia_XiongNu_WE      | Mongolia     | Historical or Others | 2152  | F | 49.27 | 101.72 | Damgaard et al. (2018) doi:10.1038/s41586-018-0094-2                                                                                                                                                   | Right-pop in qpWave and qpAdm (Outgroup),                       |
| DA39.SG                 | CAsia_XiongNu         | Mongolia     | Historical or Others | 1990  | M | 48.02 | 101.35 | Damgaard et al. (2018) doi:10.1038/s41586-018-0094-2                                                                                                                                                   | Right-pop in qpWave and qpAdm (Outgroup),                       |
| DA43.SG                 | CAsia_XiongNu         | Mongolia     | Historical or Others | 2100  | M | 42.53 | 105.18 | Damgaard et al. (2018) doi:10.1038/s41586-018-0094-2                                                                                                                                                   | Right-pop in qpWave and qpAdm (Outgroup),                       |
| DA45.SG                 | CAsia_XiongNu         | Mongolia     | Historical or Others | 2062  | M | 42.53 | 105.18 | Damgaard et al. (2018) doi:10.1038/s41586-018-0094-2                                                                                                                                                   | Right-pop in qpWave and qpAdm (Outgroup),                       |
| DolmenAnsiao96B.SG      | SWEurope_N            | Portugal     | Neolithic            | 5450  | M | 39.91 | -8.44  | Martiniano et al. (2017) doi: 10.1371/journal.pgen.1006852                                                                                                                                             | PCA, Admixture,                                                 |
| ela001.SG               | SAfrica_LSA_IA        | South Africa | Iron Age             | 493   | F | 32.32 | 18.32  | Schlebusch et al. (2017) doi: 10.1126/science.aao6266                                                                                                                                                  | PCA, Admixture,                                                 |
| ElMiron_d               | SWEurope_LUP          | Spain        | Palaeolithic         | 18720 | F | 43.26 | -3.45  | Fu et al. (2016) doi: 10.1038/nature17993                                                                                                                                                              | PCA, Admixture, NNLS,                                           |
| GoyetQ116-1_published   | WEurope_EUP           | Belgium      | Palaeolithic         | 34795 | M | 50.26 | 4.28   | Fu et al. (2016) doi: 10.1038/nature17993                                                                                                                                                              | PCA, Admixture,                                                 |
| HohleFels49_published_d | CEurope_LUP           | Germany      | Palaeolithic         | 15130 | M | 48.22 | 9.45   | Fu et al. (2016) doi: 10.1038/nature17993                                                                                                                                                              | PCA, Admixture,                                                 |
| I0017.SG                | NEurope_HG            | Sweden       | Palaeolithic         | 7626  | M | 58.54 | 15.05  | Lazaridis et al. (2014) doi: 10.1038/nature13673                                                                                                                                                       | PCA, Admixture,                                                 |
| I0061                   | NWRussia_HG           | Russia       | Palaeolithic         | 8280  | M | 61.65 | 35.65  | Mathieson et al. (2015) doi: 10.1038/nature16152 (1240k of same sample with 390k in Haak, Lazaridis, et al. (2015) doi: 10.1038/nature14317)                                                           | PCA, Admixture, Left-pop in qpWave and qpAdm for Basal Eurasia, |
| I0070                   | SEEurope_Minoan_BA    | Greece       | Bronze Age           | 4000  | M | 35.08 | 25.83  | Lazaridis et al. (2017) doi: 10.1038/nature23310                                                                                                                                                       | PCA, Admixture,                                                 |
| I0071                   | SEEurope_Minoan_BA    | Greece       | Bronze Age           | 4000  | F | 35.08 | 25.83  | Lazaridis et al. (2017) doi: 10.1038/nature23310                                                                                                                                                       | PCA, Admixture,                                                 |
| I0073                   | SEEurope_Minoan_BA    | Greece       | Bronze Age           | 4000  | M | 35.08 | 25.83  | Lazaridis et al. (2017) doi: 10.1038/nature23310                                                                                                                                                       | PCA, Admixture,                                                 |
| I0074                   | SEEurope_Minoan_BA    | Greece       | Bronze Age           | 4000  | F | 35.08 | 25.83  | Lazaridis et al. (2017) doi: 10.1038/nature23310                                                                                                                                                       | PCA, Admixture,                                                 |
| I0100                   | CEurope_LBK_EN        | Germany      | Neolithic            | 6977  | F | 51.90 | 11.05  | Lipson et al. (2017) doi: 10.1038/nature24476 (supplement of Mathieson et al. (2015) doi: 10.1038/nature16152, which itself was supplement of Haak, Lazaridis, et al. (2015) doi: 10.1038/nature14317) | PCA, Admixture, Right-pop in qpWave and qpAdm (Outgroup),       |
| I0103                   | CEurope_LN            | Germany      | Neolithic            | 4473  | F | 51.42 | 11.68  | Mathieson et al. (2015) doi: 10.1038/nature16152 (1240k of same sample with 390k in Haak, Lazaridis, et al. (2015) doi: 10.1038/nature14317)                                                           | PCA, Admixture, Right-pop in qpWave and qpAdm (Outgroup),       |
| I0112                   | CEurope_BellBeaker_BA | Germany      | Bronze Age           | 4250  | F | 51.79 | 11.14  | Mathieson et al. (2015) doi: 10.1038/nature16152 (1240k of same sample with 390k in Haak, Lazaridis, et al. (2015) doi: 10.1038/nature14317)                                                           | PCA, Admixture, NNLS, Right-pop in qpWave and qpAdm (Outgroup), |
| I0231_published         | RussiaSteppe_EMBA     | Russia       | Bronze Age           | 4800  | M | 52.71 | 49.47  | Mathieson et al. (2015) doi: 10.1038/nature16152 (1240k of same with 390k in Haak, Lazaridis, et al. (2015) doi: 10.1038/nature14317)                                                                  | PCA, Admixture, NNLS,                                           |
| I0247                   | RussiaSteppe_IA       | Russia       | Iron Age             | 2239  | M | 52.43 | 51.16  | Mathieson et al. (2015) doi: 10.1038/nature16152                                                                                                                                                       | PCA, Admixture,                                                 |
| I0405                   | SWEurope_N            | Spain        | Neolithic            | 5700  | M | 41.25 | -2.33  | Mathieson et al. (2015) doi: 10.1038/nature16152 (1240k of same sample with 390k in Haak, Lazaridis, et al. (2015) doi: 10.1038/nature14317)                                                           | PCA, Admixture,                                                 |

|                 |                   |           |              |      |   |       |        |  |                                                                                                                                              |                       |
|-----------------|-------------------|-----------|--------------|------|---|-------|--------|--|----------------------------------------------------------------------------------------------------------------------------------------------|-----------------------|
|                 |                   |           |              |      |   |       |        |  | 10.1038/nature14317)                                                                                                                         |                       |
| I0406           | SWEurope_N        | Spain     | Neolithic    | 5700 | M | 41.25 | -2.33  |  | Mathieson et al. (2015) doi: 10.1038/nature16152 (1240k of same sample with 390k in Haak, Lazaridis, et al. (2015) doi: 10.1038/nature14317) | PCA, Admixture,       |
| I0407           | SWEurope_N        | Spain     | Neolithic    | 5700 | F | 41.25 | -2.33  |  | Mathieson et al. (2015) doi: 10.1038/nature16152 (1240k of same sample with 390k in Haak, Lazaridis, et al. (2015) doi: 10.1038/nature14317) | PCA, Admixture,       |
| I0408           | SWEurope_N        | Spain     | Neolithic    | 5727 | F | 41.25 | -2.33  |  | Mathieson et al. (2015) doi: 10.1038/nature16152 (1240k of same sample with 390k in Haak, Lazaridis, et al. (2015) doi: 10.1038/nature14317) | PCA, Admixture,       |
| I0409           | SWEurope_N        | Spain     | Neolithic    | 7215 | F | 42.50 | 0.50   |  | Mathieson et al. (2015) doi: 10.1038/nature16152 (1240k of same sample with 390k in Haak, Lazaridis, et al. (2015) doi: 10.1038/nature14317) | PCA, Admixture,       |
| I0410           | SWEurope_N        | Spain     | Neolithic    | 7130 | M | 42.50 | 0.50   |  | Mathieson et al. (2015) doi: 10.1038/nature16152 (1240k of same sample with 390k in Haak, Lazaridis, et al. (2015) doi: 10.1038/nature14317) | PCA, Admixture,       |
| I0411           | SWEurope_N        | Spain     | Neolithic    | 7131 | M | 42.50 | 0.50   |  | Mathieson et al. (2015) doi: 10.1038/nature16152 (1240k of same sample with 390k in Haak, Lazaridis, et al. (2015) doi: 10.1038/nature14317) | PCA, Admixture,       |
| I0412           | SWEurope_N        | Spain     | Neolithic    | 7144 | M | 42.50 | 0.50   |  | Mathieson et al. (2015) doi: 10.1038/nature16152 (1240k of same with 390k in Haak, Lazaridis, et al. (2015) doi: 10.1038/nature14317)        | PCA, Admixture,       |
| I0413           | SWEurope_N        | Spain     | Neolithic    | 7139 | F | 42.50 | 0.50   |  | Mathieson et al. (2015) doi: 10.1038/nature16152 (1240k of same sample with 390k in Haak, Lazaridis, et al. (2015) doi: 10.1038/nature14317) | PCA, Admixture,       |
| I0443           | RussiaSteppe_EMBA | Russia    | Bronze Age   | 4950 | M | 53.38 | 50.39  |  | Mathieson et al. (2015) doi: 10.1038/nature16152 (1240k of same sample with 390k in Haak, Lazaridis, et al. (2015) doi: 10.1038/nature14317) | PCA, Admixture,       |
| I0585           | SWEurope_HG       | Spain     | Palaeolithic | 7815 | M | 42.91 | -5.38  |  | Mathieson et al. (2015) doi: 10.1038/nature16152 (1240k of same sample with shotgun in Olalde et al. (2014) doi: 10.1038/nature12960)        | PCA, Admixture, NNLS, |
| I0589_all       | SEAfrica_MIA      | Tanzania  | Iron Age     | 1335 | F | -6.40 | 39.50  |  | Skoglund et al. (2017) doi: 10.1016/j.cell.2017.08.049                                                                                       | PCA, Admixture,       |
| I0595           | EAFrica_MIA_LIA   | Kenya     | Iron Age     | 410  | M | -3.70 | 39.70  |  | Skoglund et al. (2017) doi: 10.1016/j.cell.2017.08.049                                                                                       | PCA, Admixture,       |
| I0626_all       | SEAsia_N          | Vietnam   | Neolithic    | 3750 | M | 20.13 | 105.98 |  | Lipson et al. (2018) doi: 10.1126/science.aat3188                                                                                            | PCA, Admixture,       |
| I0627_all       | SEAsia_N          | Vietnam   | Neolithic    | 3964 | F | 20.13 | 105.98 |  | Lipson et al. (2018) doi: 10.1126/science.aat3188                                                                                            | PCA, Admixture,       |
| I0676           | Balkans_N         | Macedonia | Neolithic    | 7807 | M | 41.90 | 21.35  |  | Mathieson et al. (2018) doi: 10.1038/nature25778                                                                                             | PCA, Admixture,       |
| I0679_d         | Balkans_N         | Bulgaria  | Neolithic    | 7622 | F | 42.02 | 25.60  |  | Mathieson et al. (2018) doi: 10.1038/nature25778                                                                                             | PCA, Admixture,       |
| I0698_published | Balkans_N         | Bulgaria  | Neolithic    | 7900 | M | 42.10 | 25.75  |  | Mathieson et al. (2018) doi: 10.1038/nature25778                                                                                             | PCA, Admixture,       |
| I0700           | Balkans_N         | Bulgaria  | Neolithic    | 7934 | M | 43.98 | 26.40  |  | Mathieson et al. (2018) doi: 10.1038/nature25778                                                                                             | PCA, Admixture,       |
| I0704_published | Balkans_N         | Bulgaria  | Neolithic    | 7889 | F | 43.16 | 25.88  |  | Mathieson et al. (2018) doi: 10.1038/nature25778                                                                                             | PCA, Admixture,       |
| I0706           | Balkans_N         | Bulgaria  | Neolithic    | 7905 | M | 43.16 | 25.88  |  | Mathieson et al. (2018) doi: 10.1038/nature25778                                                                                             | PCA, Admixture,       |
| I0707           | Anatolia_N        | Turkey    | Neolithic    | 8092 | F | 40.30 | 29.57  |  | Mathieson et al. (2015) doi: 10.1038/nature16152                                                                                             | PCA, Admixture,       |
| I0708           | Anatolia_N        | Turkey    | Neolithic    | 8097 | M | 40.30 | 29.57  |  | Mathieson et al. (2015) doi: 10.1038/nature16152                                                                                             | PCA, Admixture,       |
| I0709           | Anatolia_N        | Turkey    | Neolithic    | 8086 | M | 40.30 | 29.57  |  | Mathieson et al. (2015) doi: 10.1038/nature16152                                                                                             | PCA, Admixture,       |



|           |                      |          |              |       |   |       |        |                                                        |                                                                                                                                                          |
|-----------|----------------------|----------|--------------|-------|---|-------|--------|--------------------------------------------------------|----------------------------------------------------------------------------------------------------------------------------------------------------------|
| I0723     | Anatolia_N           | Turkey   | Neolithic    | 7870  | M | 40.26 | 29.65  | Mathieson et al. (2015) doi: 10.1038/nature16152       | PCA, Admixture,                                                                                                                                          |
| I0724     | Anatolia_N           | Turkey   | Neolithic    | 7950  | M | 40.26 | 29.65  | Mathieson et al. (2015) doi: 10.1038/nature16152       | PCA, Admixture,                                                                                                                                          |
| I0725     | Anatolia_N           | Turkey   | Neolithic    | 7950  | F | 40.26 | 29.65  | Mathieson et al. (2015) doi: 10.1038/nature16152       | PCA, Admixture,                                                                                                                                          |
| I0726     | Anatolia_N           | Turkey   | Neolithic    | 7950  | F | 40.26 | 29.65  | Mathieson et al. (2015) doi: 10.1038/nature16152       | PCA, Admixture,                                                                                                                                          |
| I0727     | Anatolia_N           | Turkey   | Neolithic    | 7950  | M | 40.26 | 29.65  | Mathieson et al. (2015) doi: 10.1038/nature16152       | PCA, Admixture,                                                                                                                                          |
| I0736     | Anatolia_N           | Turkey   | Neolithic    | 8300  | F | 40.30 | 29.57  | Mathieson et al. (2015) doi: 10.1038/nature16152       | PCA, Admixture,                                                                                                                                          |
| I0744     | Anatolia_N           | Turkey   | Neolithic    | 8273  | M | 40.30 | 29.57  | Mathieson et al. (2015) doi: 10.1038/nature16152       | PCA, Admixture,                                                                                                                                          |
| I0745     | Anatolia_N           | Turkey   | Neolithic    | 8251  | M | 40.30 | 29.57  | Mathieson et al. (2015) doi: 10.1038/nature16152       | PCA, Admixture,                                                                                                                                          |
| I0746     | Anatolia_N           | Turkey   | Neolithic    | 7930  | M | 40.30 | 29.57  | Mathieson et al. (2015) doi: 10.1038/nature16152       | PCA, Admixture,                                                                                                                                          |
| I0854     | Anatolia_N           | Turkey   | Neolithic    | 8106  | F | 40.30 | 29.57  | Mathieson et al. (2015) doi: 10.1038/nature16152       | PCA, Admixture,                                                                                                                                          |
| I0861     | Natufian             | Israel   | Palaeolithic | 12750 | M | 32.65 | 35.07  | Lazaridis et al. (2016) doi: 10.1038/nature19310       | PCA, Admixture,                                                                                                                                          |
| I0867     | Levant_PPNB          | Israel   | Neolithic    | 8700  | M | 31.79 | 35.17  | Lazaridis et al. (2016) doi: 10.1038/nature19310       | PCA, Admixture, NNLS, Left-pop in qpWave and qpAdm,                                                                                                      |
| I1048     | SEAfrica_LSA         | Tanzania | Palaeolithic | 1358  | F | -4.90 | 39.60  | Skoglund et al. (2017) doi: 10.1016/j.cell.2017.08.049 | PCA, Admixture,                                                                                                                                          |
| I1072     | Natufian             | Israel   | Palaeolithic | 12750 | M | 32.65 | 35.07  | Lazaridis et al. (2016) doi: 10.1038/nature19310       | PCA, Admixture, NNLS, Left-pop in qpWave and qpAdm, Left-pop in qpWave and qpAdm for Basal Eurasia, $f_4$ -statistics, $f_4$ -statistics for Neanderthal |
| I1096     | Anatolia_N           | Turkey   | Neolithic    | 8300  | M | 40.30 | 29.57  | Mathieson et al. (2015) doi: 10.1038/nature16152       | PCA, Admixture,                                                                                                                                          |
| I1097     | Anatolia_N           | Turkey   | Neolithic    | 8288  | M | 40.30 | 29.57  | Mathieson et al. (2015) doi: 10.1038/nature16152       | PCA, Admixture,                                                                                                                                          |
| I1098     | Anatolia_N           | Turkey   | Neolithic    | 8288  | F | 40.30 | 29.57  | Mathieson et al. (2015) doi: 10.1038/nature16152       | PCA, Admixture,                                                                                                                                          |
| I1099     | Anatolia_N           | Turkey   | Neolithic    | 8300  | M | 40.30 | 29.57  | Mathieson et al. (2015) doi: 10.1038/nature16152       | PCA, Admixture,                                                                                                                                          |
| I1100     | Anatolia_N           | Turkey   | Neolithic    | 8300  | F | 40.30 | 29.57  | Mathieson et al. (2015) doi: 10.1038/nature16152       | PCA, Admixture,                                                                                                                                          |
| I1101     | Anatolia_N           | Turkey   | Neolithic    | 8300  | M | 40.30 | 29.57  | Mathieson et al. (2015) doi: 10.1038/nature16152       | PCA, Admixture,                                                                                                                                          |
| I1102     | Anatolia_N           | Turkey   | Neolithic    | 8300  | M | 40.30 | 29.57  | Mathieson et al. (2015) doi: 10.1038/nature16152       | PCA, Admixture,                                                                                                                                          |
| I1103     | Anatolia_N           | Turkey   | Neolithic    | 8300  | M | 40.30 | 29.57  | Mathieson et al. (2015) doi: 10.1038/nature16152       | PCA, Admixture,                                                                                                                                          |
| I1108     | Balkans_N            | Bulgaria | Neolithic    | 7875  | M | 43.98 | 26.40  | Mathieson et al. (2018) doi: 10.1038/nature25778       | PCA, Admixture,                                                                                                                                          |
| I1109     | Balkans_N            | Bulgaria | Neolithic    | 7635  | F | 43.98 | 26.40  | Mathieson et al. (2018) doi: 10.1038/nature25778       | PCA, Admixture,                                                                                                                                          |
| I1113     | Balkans_N            | Bulgaria | Neolithic    | 7983  | F | 43.98 | 26.40  | Mathieson et al. (2018) doi: 10.1038/nature25778       | PCA, Admixture,                                                                                                                                          |
| I1137_all | SEAsia_N             | Vietnam  | Neolithic    | 3764  | M | 20.13 | 105.98 | Lipson et al. (2018) doi: 10.1126/science.aat3188      | PCA, Admixture,                                                                                                                                          |
| I1290     | Zagros_N             | Iran     | Neolithic    | 9846  | F | 34.45 | 48.12  | Lazaridis et al. (2016) doi: 10.1038/nature19310       | PCA, Admixture,                                                                                                                                          |
| I1293_all | Iran_EpiPalaeolithic | Iran     | Palaeolithic | 10800 | M | 35.59 | 53.50  | Lazaridis et al. (2016) doi: 10.1038/nature19310       | PCA, Admixture,                                                                                                                                          |

|                 |              |          |              |       |   |       |        |                                                                                                                                     |                                                           |
|-----------------|--------------|----------|--------------|-------|---|-------|--------|-------------------------------------------------------------------------------------------------------------------------------------|-----------------------------------------------------------|
| I1295           | Balkans_N    | Bulgaria | Neolithic    | 7752  | M | 43.98 | 26.40  | Mathieson et al. (2018) doi: 10.1038/nature25778                                                                                    | PCA, Admixture,                                           |
| I1296_published | Balkans_N    | Bulgaria | Neolithic    | 7675  | M | 43.98 | 26.40  | Mathieson et al. (2018) doi: 10.1038/nature25778                                                                                    | PCA, Admixture,                                           |
| I1297           | Balkans_N    | Bulgaria | Neolithic    | 7817  | F | 43.98 | 26.40  | Mathieson et al. (2018) doi: 10.1038/nature25778                                                                                    | PCA, Admixture,                                           |
| I1407           | Caucasus_C   | Armenia  | Copper Age   | 5875  | M | 39.73 | 45.20  | Lazaridis et al. (2016) doi: 10.1038/nature19310                                                                                    | PCA, Admixture,                                           |
| I1414_published | Levant_PPNB  | Jordan   | Neolithic    | 10050 | M | 31.99 | 35.98  | Lazaridis et al. (2016) doi: 10.1038/nature19310                                                                                    | PCA, Admixture,                                           |
| I1415_published | Levant_PPNB  | Jordan   | Neolithic    | 9875  | M | 31.99 | 35.98  | Lazaridis et al. (2016) doi: 10.1038/nature19310                                                                                    | PCA, Admixture,                                           |
| I1499           | CEurope_MN   | Hungary  | Neolithic    | 7060  | F | 48.52 | 21.17  | Mathieson et al. (2015) doi: 10.1038/nature16152 (capture of same sample shotgunned in Gamba et al. (2014) doi: 10.1038/ncomms6257) | PCA, Admixture, Right-pop in qpWave and qpAdm (Outgroup), |
| I1580           | Anatolia_N   | Turkey   | Neolithic    | 8195  | F | 40.30 | 29.57  | Mathieson et al. (2015) doi: 10.1038/nature16152                                                                                    | PCA, Admixture,                                           |
| I1581           | Anatolia_N   | Turkey   | Neolithic    | 8254  | F | 40.30 | 29.57  | Mathieson et al. (2015) doi: 10.1038/nature16152                                                                                    | PCA, Admixture,                                           |
| I1583           | Anatolia_N   | Turkey   | Neolithic    | 8281  | M | 40.30 | 29.57  | Mathieson et al. (2015) doi: 10.1038/nature16152                                                                                    | PCA, Admixture,                                           |
| I1584           | Anatolia_C   | Turkey   | Copper Age   | 5776  | F | 40.30 | 29.57  | Lazaridis et al. (2016) doi: 10.1038/nature19310                                                                                    | PCA, Admixture,                                           |
| I1633           | Caucasus_EBA | Armenia  | Bronze Age   | 4465  | F | 40.65 | 45.12  | Lazaridis et al. (2016) doi: 10.1038/nature19310                                                                                    | PCA, Admixture, NNLS, Left-pop in qpWave and qpAdm,       |
| I1656           | Caucasus_MBA | Armenia  | Bronze Age   | 3402  | F | 40.38 | 43.94  | Lazaridis et al. (2016) doi: 10.1038/nature19310                                                                                    | PCA, Admixture, NNLS,                                     |
| I1658           | Caucasus_EBA | Armenia  | Bronze Age   | 5170  | F | 40.39 | 43.89  | Lazaridis et al. (2016) doi: 10.1038/nature19310                                                                                    | PCA, Admixture,                                           |
| I1671           | Zagros_N     | Iran     | Neolithic    | 7698  | M | 34.50 | 47.96  | Lazaridis et al. (2016) doi: 10.1038/nature19310                                                                                    | PCA, Admixture,                                           |
| I1679           | Levant_PPNC  | Jordan   | Neolithic    | 8800  | F | 31.99 | 35.98  | Lazaridis et al. (2016) doi: 10.1038/nature19310                                                                                    | PCA, Admixture,                                           |
| I1680           | SEAsia_IA    | Cambodia | Iron Age     | 1810  | M | 10.99 | 104.98 | Lipson et al. (2018) doi: 10.1126/science.aat3188                                                                                   | PCA, Admixture,                                           |
| I1685_published | Natufian     | Israel   | Palaeolithic | 12750 | M | 32.65 | 35.07  | Lazaridis et al. (2016) doi: 10.1038/nature19310                                                                                    | PCA, Admixture,                                           |
| I1699           | Levant_PPNC  | Jordan   | Neolithic    | 8700  | F | 31.99 | 35.98  | Lazaridis et al. (2016) doi: 10.1038/nature19310                                                                                    | PCA, Admixture,                                           |
| I1700_published | Levant_PPNB  | Jordan   | Neolithic    | 10050 | M | 31.99 | 35.98  | Lazaridis et al. (2016) doi: 10.1038/nature19310                                                                                    | PCA, Admixture,                                           |
| I1704           | Levant_PPNB  | Jordan   | Neolithic    | 9202  | F | 31.99 | 35.98  | Lazaridis et al. (2016) doi: 10.1038/nature19310                                                                                    | PCA, Admixture,                                           |
| I1705           | Levant_EBA   | Jordan   | Bronze Age   | 4032  | M | 31.99 | 35.98  | Lazaridis et al. (2016) doi: 10.1038/nature19310                                                                                    | PCA, Admixture, NNLS, Left-pop in qpWave and qpAdm,       |
| I1706           | Levant_EBA   | Jordan   | Bronze Age   | 4345  | F | 31.99 | 35.98  | Lazaridis et al. (2016) doi: 10.1038/nature19310                                                                                    | PCA, Admixture,                                           |
| I1707           | Levant_PPNB  | Jordan   | Neolithic    | 9582  | M | 31.99 | 35.98  | Lazaridis et al. (2016) doi: 10.1038/nature19310                                                                                    | PCA, Admixture,                                           |
| I1710           | Levant_PPNB  | Jordan   | Neolithic    | 9580  | M | 31.99 | 35.98  | Lazaridis et al. (2016) doi: 10.1038/nature19310                                                                                    | PCA, Admixture,                                           |
| I1727           | Levant_PPNB  | Jordan   | Neolithic    | 10050 | M | 31.99 | 35.98  | Lazaridis et al. (2016) doi: 10.1038/nature19310                                                                                    | PCA, Admixture,                                           |
| I1730           | Levant_EBA   | Jordan   | Bronze Age   | 4344  | M | 31.99 | 35.98  | Lazaridis et al. (2016) doi: 10.1038/nature19310                                                                                    | PCA, Admixture,                                           |
| I1859_all       | SEAsia_N     | Vietnam  | Neolithic    | 3766  | F | 20.13 | 105.98 | Lipson et al. (2018) doi: 10.1126/science.aat3188                                                                                   | PCA, Admixture,                                           |

|                 |                       |          |              |       |   |        |        |                                                        |                       |
|-----------------|-----------------------|----------|--------------|-------|---|--------|--------|--------------------------------------------------------|-----------------------|
| I1945_published | Zagros_N              | Iran     | Neolithic    | 9800  | M | 34.45  | 48.12  | Lazaridis et al. (2016) doi: 10.1038/nature19310       | PCA, Admixture,       |
| I1949_published | Zagros_N              | Iran     | Neolithic    | 10052 | M | 34.45  | 48.12  | Lazaridis et al. (2016) doi: 10.1038/nature19310       | PCA, Admixture,       |
| I1972           | SWEurope_N            | Spain    | Neolithic    | 6710  | F | 42.63  | -3.12  | Lipson et al. (2017) doi: 10.1038/nature24476          | PCA, Admixture,       |
| I1979           | SEurope_BellBeaker_BA | Italy    | Bronze Age   | 4015  | F | 44.78  | 10.29  | Olalde et al. (2018) doi: 10.1038/nature25738          | PCA, Admixture,       |
| I2158_published | SEurope_HG            | Italy    | Palaeolithic | 14275 | F | 37.93  | 12.33  | Mathieson et al. (2018) doi: 10.1038/nature25778       | PCA, Admixture,       |
| I2199           | SWEurope_N            | Spain    | Neolithic    | 7074  | F | 42.63  | -3.12  | Lipson et al. (2017) doi: 10.1038/nature24476          | PCA, Admixture,       |
| I2215_published | Balkans_N             | Bulgaria | Neolithic    | 7980  | M | 43.98  | 26.40  | Mathieson et al. (2018) doi: 10.1038/nature25778       | PCA, Admixture,       |
| I2216_published | Balkans_N             | Bulgaria | Neolithic    | 7845  | F | 43.98  | 26.40  | Mathieson et al. (2018) doi: 10.1038/nature25778       | PCA, Admixture,       |
| I2318           | SEurope_Peloponnese_N | Greece   | Neolithic    | 5945  | F | 37.42  | 23.13  | Mathieson et al. (2018) doi: 10.1038/nature25778       | PCA, Admixture,       |
| I2477           | SEurope_BellBeaker_BA | Italy    | Bronze Age   | 4015  | F | 44.78  | 10.29  | Olalde et al. (2018) doi: 10.1038/nature25738          | PCA, Admixture, NNLS, |
| I2478           | SEurope_BellBeaker_BA | Italy    | Bronze Age   | 4018  | M | 44.78  | 10.29  | Olalde et al. (2018) doi: 10.1038/nature25738          | PCA, Admixture,       |
| I2495           | Anatolia_EBA          | Turkey   | Bronze Age   | 4377  | M | 37.92  | 30.71  | Lazaridis et al. (2017) doi: 10.1038/nature23310       | PCA, Admixture, NNLS, |
| I2497_all       | SEAsia_BA             | Vietnam  | Bronze Age   | 2000  | F | 19.80  | 105.80 | Lipson et al. (2018) doi: 10.1126/science.aat3188      | PCA, Admixture        |
| I2499           | Anatolia_EBA          | Turkey   | Bronze Age   | 4604  | F | 37.92  | 30.71  | Lazaridis et al. (2017) doi: 10.1038/nature23310       | PCA, Admixture        |
| I2521           | Balkans_N             | Bulgaria | Neolithic    | 7505  | M | 43.16  | 25.88  | Mathieson et al. (2018) doi: 10.1038/nature25778       | PCA, Admixture        |
| I2526           | Balkans_N             | Bulgaria | Neolithic    | 7336  | F | 43.14  | 25.61  | Mathieson et al. (2018) doi: 10.1038/nature25778       | PCA, Admixture        |
| I2529_published | Balkans_N             | Bulgaria | Neolithic    | 7601  | M | 42.10  | 25.75  | Mathieson et al. (2018) doi: 10.1038/nature25778       | PCA, Admixture        |
| I2683           | Anatolia_EBA          | Turkey   | Bronze Age   | 4494  | F | 37.92  | 30.71  | Lazaridis et al. (2017) doi: 10.1038/nature23310       | PCA, Admixture,       |
| I2731_all       | SEAsia_N              | Vietnam  | Neolithic    | 3717  | M | 20.13  | 105.98 | Lipson et al. (2018) doi: 10.1126/science.aat3188      | PCA, Admixture,       |
| I2947           | SEAsia_N              | Vietnam  | Neolithic    | 3750  | F | 20.13  | 105.98 | Lipson et al. (2018) doi: 10.1126/science.aat3188      | PCA, Admixture,       |
| I2948_all       | SEAsia_BA             | Vietnam  | Bronze Age   | 1948  | M | 19.80  | 105.80 | Lipson et al. (2018) doi: 10.1126/science.aat3188      | PCA, Admixture,       |
| I2966_all       | SEAfrica_HG           | Malawi   | Palaeolithic | 7950  | M | -11.66 | 33.64  | Skoglund et al. (2017) doi: 10.1016/j.cell.2017.08.049 | PCA, Admixture,       |
| I2967_all       | SEAfrica_HG           | Malawi   | Palaeolithic | 8065  | F | -11.66 | 33.64  | Skoglund et al. (2017) doi: 10.1016/j.cell.2017.08.049 | PCA, Admixture,       |
| I3433           | Balkans_N             | Croatia  | Neolithic    | 7814  | F | 43.59  | 16.65  | Mathieson et al. (2018) doi: 10.1038/nature25778       | PCA, Admixture,       |
| I3498           | Balkans_N             | Croatia  | Neolithic    | 7698  | M | 45.34  | 18.70  | Mathieson et al. (2018) doi: 10.1038/nature25778       | PCA, Admixture,       |
| I3499           | Balkans_N             | Croatia  | Neolithic    | 4725  | M | 45.34  | 18.70  | Mathieson et al. (2018) doi: 10.1038/nature25778       | PCA, Admixture,       |
| I3708           | SEurope_Peloponnese_N | Greece   | Neolithic    | 6550  | F | 36.64  | 22.38  | Mathieson et al. (2018) doi: 10.1038/nature25778       | PCA, Admixture,       |
| I3709           | SEurope_Peloponnese_N | Greece   | Neolithic    | 5847  | F | 36.64  | 22.38  | Mathieson et al. (2018) doi: 10.1038/nature25778       | PCA, Admixture,       |
| I3726_all       | SEAfrica_N            | Tanzania | Neolithic    | 3079  | F | -4.26  | 35.32  | Skoglund et al. (2017) doi: 10.1016/j.cell.2017.08.049 | PCA, Admixture,       |

|                     |                        |          |              |       |   |        |       |                                                        |                       |
|---------------------|------------------------|----------|--------------|-------|---|--------|-------|--------------------------------------------------------|-----------------------|
| I3879               | Balkans_N              | Bulgaria | Neolithic    | 7828  | M | 43.98  | 26.40 | Mathieson et al. (2018) doi: 10.1038/nature25778       | PCA, Admixture,       |
| I3920               | SEEurope_Peloponnese_N | Greece   | Neolithic    | 5770  | F | 36.64  | 22.38 | Mathieson et al. (2018) doi: 10.1038/nature25778       | PCA, Admixture,       |
| I3947               | Balkans_N              | Croatia  | Neolithic    | 7836  | M | 43.59  | 16.65 | Mathieson et al. (2018) doi: 10.1038/nature25778       | PCA, Admixture,       |
| I3948               | Balkans_N              | Croatia  | Neolithic    | 7860  | M | 43.59  | 16.65 | Mathieson et al. (2018) doi: 10.1038/nature25778       | PCA, Admixture,       |
| I4167               | Balkans_N              | Croatia  | Neolithic    | 6624  | M | 45.34  | 18.70 | Mathieson et al. (2018) doi: 10.1038/nature25778       | PCA, Admixture,       |
| I4168               | Balkans_N              | Croatia  | Neolithic    | 6600  | F | 45.34  | 18.70 | Mathieson et al. (2018) doi: 10.1038/nature25778       | PCA, Admixture,       |
| I4421_all_published | SEAfrica_LSA           | Malawi   | Palaeolithic | 5200  | F | -14.38 | 33.82 | Skoglund et al. (2017) doi: 10.1016/j.cell.2017.08.049 | PCA, Admixture,       |
| I4426_all_published | SEAfrica_LSA           | Malawi   | Palaeolithic | 2517  | F | -10.79 | 33.77 | Skoglund et al. (2017) doi: 10.1016/j.cell.2017.08.049 | PCA, Admixture,       |
| I4427_all_published | SEAfrica_LSA           | Malawi   | Palaeolithic | 6061  | M | -10.79 | 33.77 | Skoglund et al. (2017) doi: 10.1016/j.cell.2017.08.049 | PCA, Admixture,       |
| I4468_all_published | SEAfrica_LSA           | Malawi   | Palaeolithic | 6087  | M | -10.79 | 33.77 | Skoglund et al. (2017) doi: 10.1016/j.cell.2017.08.049 | PCA, Admixture,       |
| I4930               | SEurope_C              | Italy    | Copper Age   | 4721  | F | 37.73  | 12.96 | Olalde et al. (2018) doi: 10.1038/nature25738          | PCA, Admixture,       |
| I5071               | Balkans_N              | Croatia  | Neolithic    | 7571  | F | 45.37  | 13.56 | Mathieson et al. (2018) doi: 10.1038/nature25778       | PCA, Admixture,       |
| I5072               | Balkans_N              | Croatia  | Neolithic    | 7551  | M | 45.37  | 13.56 | Mathieson et al. (2018) doi: 10.1038/nature25778       | PCA, Admixture,       |
| I5077               | Balkans_N              | Croatia  | Neolithic    | 7026  | M | 45.55  | 18.75 | Mathieson et al. (2018) doi: 10.1038/nature25778       | PCA, Admixture,       |
| I5078               | Balkans_N              | Croatia  | Neolithic    | 6569  | M | 45.55  | 18.75 | Mathieson et al. (2018) doi: 10.1038/nature25778       | PCA, Admixture, NNLS, |
| I5079               | Balkans_N              | Croatia  | Neolithic    | 5485  | F | 45.49  | 17.64 | Mathieson et al. (2018) doi: 10.1038/nature25778       | PCA, Admixture,       |
| I5235               | Balkans_HG             | Serbia   | Palaeolithic | 10835 | M | 44.60  | 22.01 | Mathieson et al. (2018) doi: 10.1038/nature25778       | PCA, Admixture,       |
| I5236               | Balkans_HG             | Serbia   | Palaeolithic | 10008 | M | 44.60  | 22.01 | Mathieson et al. (2018) doi: 10.1038/nature25778       | PCA, Admixture,       |
| I5239               | Balkans_HG             | Serbia   | Palaeolithic | 10333 | F | 44.60  | 22.01 | Mathieson et al. (2018) doi: 10.1038/nature25778       | PCA, Admixture,       |
| I5240               | Balkans_HG             | Serbia   | Palaeolithic | 10805 | M | 44.60  | 22.01 | Mathieson et al. (2018) doi: 10.1038/nature25778       | PCA, Admixture,       |
| I5241               | Balkans_HG             | Serbia   | Palaeolithic | 11196 | F | 44.60  | 22.01 | Mathieson et al. (2018) doi: 10.1038/nature25778       | PCA, Admixture,       |
| I5242               | Balkans_HG             | Serbia   | Palaeolithic | 10530 | F | 44.60  | 22.01 | Mathieson et al. (2018) doi: 10.1038/nature25778       | PCA, Admixture, NNLS, |
| I5244               | Balkans_HG             | Serbia   | Palaeolithic | 10785 | F | 44.60  | 22.01 | Mathieson et al. (2018) doi: 10.1038/nature25778       | PCA, Admixture,       |
| I5427               | SEEurope_Peloponnese_N | Greece   | Neolithic    | 7892  | F | 36.64  | 22.38 | Mathieson et al. (2018) doi: 10.1038/nature25778       | PCA, Admixture,       |
| I5773_published     | Balkans_HG             | Serbia   | Palaeolithic | 10040 | M | 44.53  | 22.05 | Mathieson et al. (2018) doi: 10.1038/nature25778       | PCA, Admixture,       |
| I6601               | SWEurope_C             | Portugal | Copper Age   | 4250  | M | 39.09  | -9.29 | Olalde et al. (2018) doi: 10.1038/nature25738          | PCA, Admixture,       |
| I9005               | SEEurope_Minoan_BA     | Greece   | Bronze Age   | 4000  | F | 35.08  | 25.83 | Lazaridis et al. (2017) doi: 10.1038/nature23310       | PCA, Admixture,       |
| I9006               | SEEurope_Mycenaean_BA  | Greece   | Bronze Age   | 3287  | F | 37.97  | 23.50 | Lazaridis et al. (2017) doi: 10.1038/nature23310       | PCA, Admixture,       |
| I9010               | SEEurope_Mycenaean_BA  | Greece   | Bronze Age   | 3250  | F | 37.50  | 23.45 | Lazaridis et al. (2017) doi: 10.1038/nature23310       | PCA, Admixture,       |

|                        |                       |              |              |       |   |        |        |                                                            |                                                                                                                                                                      |
|------------------------|-----------------------|--------------|--------------|-------|---|--------|--------|------------------------------------------------------------|----------------------------------------------------------------------------------------------------------------------------------------------------------------------|
| I9028.SG               | SAfrica_HG            | South Africa | Palaeolithic | 2103  | M | -32.76 | 18.03  | Skoglund et al. (2017) doi: 10.1016/j.cell.2017.08.049     | PCA, Admixture,                                                                                                                                                      |
| I9033                  | SEurope_Mycenaean_BA  | Greece       | Bronze Age   | 3298  | F | 36.92  | 21.70  | Lazaridis et al. (2017) doi: 10.1038/nature23310           | PCA, Admixture,                                                                                                                                                      |
| I9041                  | SEurope_Mycenaean_BA  | Greece       | Bronze Age   | 3250  | M | 37.50  | 23.45  | Lazaridis et al. (2017) doi: 10.1038/nature23310           | PCA, Admixture,                                                                                                                                                      |
| I9133.SG               | SAfrica_LSA           | South Africa | Palaeolithic | 1970  | M | -31.98 | 18.52  | Skoglund et al. (2017) doi: 10.1016/j.cell.2017.08.049     | PCA, Admixture,                                                                                                                                                      |
| I9134.SG               | SAfrica_LSA           | South Africa | Palaeolithic | 1199  | F | -32.81 | 17.95  | Skoglund et al. (2017) doi: 10.1016/j.cell.2017.08.049     | PCA, Admixture,                                                                                                                                                      |
| IAM.4                  | NAfrica_EN            | Morocco      | Neolithic    | 7021  | M | 33.82  | -6.07  | Fregel et al. (2018) doi: 10.1073/pnas.1800851115          | PCA, Admixture,                                                                                                                                                      |
| IAM.5                  | NAfrica_EN            | Morocco      | Neolithic    | 7125  | M | 33.82  | -6.07  | Fregel et al. (2018) doi: 10.1073/pnas.1800851115          | PCA, Admixture, Left-pop in qpWave and qpAdm,                                                                                                                        |
| IAM.6                  | NAfrica_EN            | Morocco      | Neolithic    | 6870  | F | 33.82  | -6.07  | Fregel et al. (2018) doi: 10.1073/pnas.1800851115          | PCA, Admixture,                                                                                                                                                      |
| IAM.7                  | NAfrica_EN            | Morocco      | Neolithic    | 5665  | M | 33.82  | -6.07  | Fregel et al. (2018) doi: 10.1073/pnas.1800851115          | PCA, Admixture,                                                                                                                                                      |
| Iboussiers25-1         | WEurope_WHG           | France       | Palaeolithic | 11725 | M | 44.29  | 4.46   | Mathieson et al. (2018) doi: 10.1038/nature25778           | PCA, Admixture,                                                                                                                                                      |
| Iboussiers31-2         | WEurope_WHG           | France       | Palaeolithic | 11725 | M | 44.29  | 4.46   | Mathieson et al. (2018) doi: 10.1038/nature25778           | PCA, Admixture,                                                                                                                                                      |
| Iceman.SG              | SEurope_MN            | Italy        | Neolithic    | 5244  | M | 46.77  | 10.83  | Keller et al. (2012) doi: 10.1038/ncomms1701               | PCA, Admixture, NNLS,                                                                                                                                                |
| In661.WGC              | SEAsia_LN_BA_IA       | Indonesia    | Bronze Age   | 1872  | F | 0.59   | 101.34 | McColl et al. (2018) doi: 10.1126/science.aat3628          | PCA, Admixture,                                                                                                                                                      |
| In662.SG               | SEAsia_LN_BA_IA       | Indonesia    | Bronze Age   | 2176  | M | 0.59   | 101.34 | McColl et al. (2018) doi: 10.1126/science.aat3628          | PCA, Admixture,                                                                                                                                                      |
| KEB.1                  | NAfrica_LN            | Morocco      | Neolithic    | 5650  | F | 34.03  | -6.83  | Fregel et al. (2018) doi: 10.1073/pnas.1800851115          | PCA, Admixture,                                                                                                                                                      |
| KEB.4                  | NAfrica_LN            | Morocco      | Neolithic    | 5650  | F | 34.03  | -6.83  | Fregel et al. (2018) doi: 10.1073/pnas.1800851115          | PCA, Admixture, Left-pop in qpWave and qpAdm,                                                                                                                        |
| KEB.6                  | NAfrica_LN            | Morocco      | Neolithic    | 5650  | M | 34.03  | -6.83  | Fregel et al. (2018) doi: 10.1073/pnas.1800851115          | PCA, Admixture,                                                                                                                                                      |
| KK1.SG                 | Kotias_HG/Caucasus_HG | Georgia      | Palaeolithic | 9720  | M | 42.28  | 43.28  | Jones et al. (2015) doi: 10.1038/ncomms9912                | PCA, Admixture, NNLS, Left-pop in qpWave and qpAdm, Left-pop in qpWave and qpAdm for Basal Eurasia, $f_4$ -statistics, $f_4$ -statistics for Neanderthal             |
| Kostenki14             | Russia_EUP            | Russia       | Palaeolithic | 37470 | M | 51.23  | 39.30  | Fu et al. (2016) doi: 10.1038/nature17993                  | PCA, Admixture, Right-pop in qpWave and qpAdm (Outgroup), Right-pop in qpWave and qpAdm for Basal Eurasia (Outgroup),                                                |
| kum6.SG                | Anatolia_N            | Turkey       | Neolithic    | 6682  | F | 39.95  | 26.20  | Omrak et al. (2016) doi: 10.1016/j.cub.2015.12.019         | PCA, Admixture,                                                                                                                                                      |
| La364.SG               | SEAsia_LN_BA          | Laos         | Bronze Age   | 2976  | M | 17.81  | 97.78  | McColl et al. (2018) doi: 10.1126/science.aat3628          | PCA, Admixture,                                                                                                                                                      |
| La368.SG               | SEAsia_HG             | Laos         | Palaeolithic | 7872  | M | 18.44  | 104.47 | McColl et al. (2018) doi: 10.1126/science.aat3628          | PCA, Admixture,                                                                                                                                                      |
| La727.WGC              | SEAsia_BA             | Laos         | Bronze Age   | 2281  | F | 17.81  | 97.78  | McColl et al. (2018) doi: 10.1126/science.aat3628          | PCA, Admixture,                                                                                                                                                      |
| Loschbour_published.DG | CEurope_HG            | Luxembourg   | Palaeolithic | 8050  | M | 49.81  | 6.40   | Lazaridis et al. (2014) doi: 10.1038/nature13673           | PCA, Admixture, NNLS, Right-pop in qpWave and qpAdm (Outgroup), Left-pop in qpWave and qpAdm for Basal Eurasia, $f_4$ -statistics, $f_4$ -statistics for Neanderthal |
| LugarCanto41.SG        | SWEurope_N            | Portugal     | Neolithic    | 5950  | F | 40.78  | -7.52  | Martiniano et al. (2017) doi: 10.1371/journal.pgen.1006852 | PCA, Admixture,                                                                                                                                                      |
| LugarCanto42.SG        | SWEurope_N            | Portugal     | Neolithic    | 5950  | F | 40.78  | -7.52  | Martiniano et al. (2017) doi: 10.1371/journal.pgen.1006852 | PCA, Admixture, NNLS,                                                                                                                                                |

|                        |                            |              |                      |       |   |       |        |                                                              |                                                                                                                      |
|------------------------|----------------------------|--------------|----------------------|-------|---|-------|--------|--------------------------------------------------------------|----------------------------------------------------------------------------------------------------------------------|
| LugarCanto44.SG        | SWEurope_N                 | Portugal     | Neolithic            | 5950  | F | 40.78 | -7.52  | Martiniano et al. (2017) doi: 10.1371/journal.pgen.1006852   | PCA, Admixture,                                                                                                      |
| LugarCanto45.SG        | SWEurope_N                 | Portugal     | Neolithic            | 5950  | M | 40.78 | -7.52  | Martiniano et al. (2017) doi: 10.1371/journal.pgen.1006852   | PCA, Admixture,                                                                                                      |
| M63.SG                 | SAsia_Mebrak               | Nepal        | Historical or Others | 2125  | M | 29.00 | 83.85  | Jeong et al. (2016) doi: 10.1073/pnas.1520844113             | Right-pop in qpWave and qpAdm (Outgroup),                                                                            |
| MA1.SG                 | Russia_HG                  | Russia       | Palaeolithic         | 24305 | M | 52.90 | 103.50 | Raghavan et al. (2013) doi: 10.1038/nature12736              | PCA, Admixture, Right-pop in qpWave and qpAdm (Outgroup),                                                            |
| Ma555.SG               | SEAsia_Historical          | Malaysia     | Historical or Others | 376   | M | 5.25  | 117.00 | McCull et al. (2018) doi: 10.1126/science.aat3628            | Right-pop in qpWave and qpAdm (Outgroup),                                                                            |
| Ma912.SG               | SEAsia_LN                  | Malaysia     | Neolithic            | 2520  | M | 5.25  | 102.00 | McCull et al. (2018) doi: 10.1126/science.aat3628            | PCA, Admixture, Right-pop in qpWave and qpAdm (Outgroup),                                                            |
| mfo001.SG              | SAfrica_IA                 | South Africa | Iron Age             | 378   | F | 28.71 | 30.84  | Schlebusch et al. (2017) doi: 10.1126/science.aao6266        | PCA, Admixture,                                                                                                      |
| MonteCanelas337A.SG    | SWEurope_N                 | Portugal     | Neolithic            | 4953  | M | 37.21 | -8.55  | Martiniano et al. (2017) doi: 10.1371/journal.pgen.1006852   | PCA, Admixture,                                                                                                      |
| mota.SG                | Mota_EN/Eafrica_EN         | Ethiopia     | Neolithic            | 4472  | M | 6.80  | 38.21  | Llorente et al. (2015) doi: 10.1126/science.aaf3945          | PCA, Admixture, Right-pop in qpWave and qpAdm (Outgroup), Left-pop in qpWave and qpAdm for Basal Eurasia,            |
| mur.SG                 | SWEurope_N                 | Spain        | Neolithic            | 7136  | M | 37.54 | -4.30  | Valdiosera et al. (2018) doi: 10.1073/pnas.1717762115        | PCA, Admixture,                                                                                                      |
| new001.SG              | SAfrica_IA                 | South Africa | Iron Age             | 418   | F | 27.71 | 30.00  | Schlebusch et al. (2017) doi: 10.1126/science.aao6266        | PCA, Admixture,                                                                                                      |
| Ostuni1_d              | SEurope_MUP                | Italy        | Palaeolithic         | 27620 | F | 40.73 | 17.57  | Fu et al. (2016) doi: 10.1038/nature17993                    | PCA, Admixture,                                                                                                      |
| Paglicci133_published  | SEurope_MUP                | Italy        | Palaeolithic         | 32895 | M | 41.65 | 15.61  | Fu et al. (2016) doi: 10.1038/nature17993                    | PCA, Admixture,                                                                                                      |
| RISE487.SG             | SEurope_BA                 | Italy        | Bronze Age           | 5245  | M | 45.26 | 10.38  | Allentoft et al. (2015) doi: 10.1038/nature14507             | PCA, Admixture,                                                                                                      |
| RISE489.SG             | SEurope_BA                 | Italy        | Bronze Age           | 4693  | M | 45.26 | 10.38  | Allentoft et al. (2015) doi: 10.1038/nature14507             | PCA, Admixture,                                                                                                      |
| RISE500.SG             | RussiaSteppe_MLBA          | Russia       | Bronze Age           | 3550  | F | 53.46 | 85.45  | Allentoft et al. (2015) doi: 10.1038/nature14507             | PCA, Admixture,                                                                                                      |
| RISE505.SG             | RussiaSteppe_MLBA          | Russia       | Bronze Age           | 3636  | F | 53.46 | 85.45  | Allentoft et al. (2015) doi: 10.1038/nature14507             | PCA, Admixture, NNLS,                                                                                                |
| RISE552.SG             | RussiaSteppe_EMBA          | Russia       | Bronze Age           | 4446  | M | 46.62 | 43.33  | Allentoft et al. (2015) doi: 10.1038/nature14507             | PCA, Admixture,                                                                                                      |
| S10.SG                 | SAsia_Samdzung             | Nepal        | Historical or Others | 1500  | M | 28.93 | 83.91  | Jeong et al. (2016) doi: 10.1073/pnas.1520844113             | Right-pop in qpWave and qpAdm (Outgroup),                                                                            |
| S35.SG                 | SAsia_Samdzung             | Nepal        | Historical or Others | 1500  | M | 28.93 | 83.91  | Jeong et al. (2016) doi: 10.1073/pnas.1520844113             | Right-pop in qpWave and qpAdm (Outgroup),                                                                            |
| S41.SG                 | SAsia_Samdzung             | Nepal        | Historical or Others | 1500  | M | 28.93 | 83.91  | Jeong et al. (2016) doi: 10.1073/pnas.1520844113             | Right-pop in qpWave and qpAdm (Outgroup),                                                                            |
| san216.SG              | SWEurope_N                 | Spain        | Neolithic            | 5666  | M | 42.31 | 0.36   | Valdiosera et al. (2018) doi: 10.1073/pnas.1717762115        | PCA, Admixture,                                                                                                      |
| SATP.SG                | Satsurbliia_HG/Caucasus_HG | Georgia      | Palaeolithic         | 13255 | M | 42.38 | 42.59  | Jones et al. (2015) doi: 10.1038/ncomms9912                  | PCA, Admixture, Left-pop in qpWave and qpAdm for Basal Eurasia, $f_4$ -statistics, $f_4$ -statistics for Neanderthal |
| Stuttgart_published.DG | CEurope_LBK_EN             | Germany      | Neolithic            | 7140  | F | 48.78 | 9.18   | Lazaridis et al. (2014) doi: 10.1038/nature13673             | PCA, Admixture, Right-pop in qpWave and qpAdm (Outgroup)                                                             |
| TAF009                 | Iberomaurasian             | Morocco      | Palaeolithic         | 14357 | M | 34.81 | -2.41  | van de Loosdrecht et al. (2018) doi: 10.1126/science.aar8380 | PCA, Admixture                                                                                                       |
| TAF010                 | Iberomaurasian             | Morocco      | Palaeolithic         | 14605 | M | 34.81 | -2.41  | van de Loosdrecht et al. (2018) doi: 10.1126/science.aar8380 | PCA, Admixture                                                                                                       |
| TAF011                 | Iberomaurasian             | Morocco      | Palaeolithic         | 14500 | M | 34.81 | -2.41  | van de Loosdrecht et al. (2018) doi: 10.1126/science.aar8380 | PCA, Admixture, NNLS, Left-pop in qpWave and qpAdm, Left-pop in qpWave and qpAdm for Basal                           |

|                        |                     |                |              |       |   |       |        |                                                              |                                                                                                                                                  |                                                       |
|------------------------|---------------------|----------------|--------------|-------|---|-------|--------|--------------------------------------------------------------|--------------------------------------------------------------------------------------------------------------------------------------------------|-------------------------------------------------------|
|                        |                     |                |              |       |   |       |        |                                                              |                                                                                                                                                  | Eurasia, f4-Statistics, f4-Statistics for Neanderthal |
| TAF012                 | Iberomaurusian      | Morocco        | Palaeolithic | 14470 | F | 34.81 | -2.41  | van de Loosdrecht et al. (2018) doi: 10.1126/science.aar8380 | PCA, Admixture,                                                                                                                                  |                                                       |
| TAF013                 | Iberomaurusian      | Morocco        | Palaeolithic | 14500 | M | 34.81 | -2.41  | van de Loosdrecht et al. (2018) doi: 10.1126/science.aar8380 | PCA, Admixture,                                                                                                                                  |                                                       |
| TAF014                 | Iberomaurusian      | Morocco        | Palaeolithic | 14500 | M | 34.81 | -2.41  | van de Loosdrecht et al. (2018) doi: 10.1126/science.aar8380 | PCA, Admixture,                                                                                                                                  |                                                       |
| TAF015                 | Iberomaurusian      | Morocco        | Palaeolithic | 14500 | M | 34.81 | -2.41  | van de Loosdrecht et al. (2018) doi: 10.1126/science.aar8380 | PCA, Admixture,                                                                                                                                  |                                                       |
| Tep002.SG              | Anatolia_N          | Turkey         | Neolithic    | 8585  | F | 38.17 | 34.49  | Kilinc et al. (2016) doi: 10.1016/j.cub.2016.07.057          | PCA, Admixture,                                                                                                                                  |                                                       |
| Tep003.SG              | Anatolia_N          | Turkey         | Neolithic    | 8505  | M | 38.17 | 34.49  | Kilinc et al. (2016) doi: 10.1016/j.cub.2016.07.057          | PCA, Admixture,                                                                                                                                  |                                                       |
| Tep004.SG              | Anatolia_N          | Turkey         | Neolithic    | 8295  | F | 38.17 | 34.49  | Kilinc et al. (2016) doi: 10.1016/j.cub.2016.07.057          | PCA, Admixture,                                                                                                                                  |                                                       |
| Tep006.SG              | Anatolia_N          | Turkey         | Neolithic    | 8230  | M | 38.17 | 34.49  | Kilinc et al. (2016) doi: 10.1016/j.cub.2016.07.057          | PCA, Admixture,                                                                                                                                  |                                                       |
| Tianyuan               | EAsia_UP            | China          | Palaeolithic | 39475 | M | 39.39 | 115.52 | Yang et al. (2017) doi: 10.1016/j.cub.2017.09.030            | PCA, Admixture,                                                                                                                                  |                                                       |
| TOR.11                 | SWEurope_N          | Spain          | Neolithic    | 6980  | F | 36.63 | -4.52  | Fregel et al. (2018) doi: 10.1073/pnas.1800851115            | PCA, Admixture,                                                                                                                                  |                                                       |
| TOR.6                  | SWEurope_N          | Spain          | Neolithic    | 6980  | F | 36.63 | -4.52  | Fregel et al. (2018) doi: 10.1073/pnas.1800851115            | PCA, Admixture,                                                                                                                                  |                                                       |
| TOR.7                  | SWEurope_N          | Spain          | Neolithic    | 6980  | F | 36.63 | -4.52  | Fregel et al. (2018) doi: 10.1073/pnas.1800851115            | PCA, Admixture,                                                                                                                                  |                                                       |
| TOR.8                  | SWEurope_N          | Spain          | Neolithic    | 6980  | F | 36.63 | -4.52  | Fregel et al. (2018) doi: 10.1073/pnas.1800851115            | PCA, Admixture,                                                                                                                                  |                                                       |
| Ust_Ishim_published.DG | Ust_Ishim/Russia_HG | Russia         | Palaeolithic | 45020 | M | 57.70 | 71.10  | Fu et al. (2014) doi: 10.1038/nature13810                    | PCA, Admixture, Right-pop in qpWave and qpAdm (Outgroup), Right-pop in qpWave and qpAdm for Basal Eurasia (Outgroup), f4-Statistics              |                                                       |
| Vestonice16            | CEurope_MUP         | Czech Republic | Palaeolithic | 30010 | M | 48.53 | 16.39  | Fu et al. (2016) doi: 10.1038/nature17993                    | PCA, Admixture, Right-pop in qpWave and qpAdm (Outgroup)                                                                                         |                                                       |
| Villabruna             | SEurope_HG          | Italy          | Palaeolithic | 13980 | M | 46.15 | 12.21  | Fu et al. (2016) doi: 10.1038/nature17993                    | PCA, Admixture, NNLS                                                                                                                             |                                                       |
| Vt777.SG               | SEAsia_N            | Vietnam        | Neolithic    | 2265  | F | 19.81 | 105.79 | McCull et al. (2018) doi: 10.1126/science.aat3628            | PCA, Admixture                                                                                                                                   |                                                       |
| Vt778.SG               | SEAsia_N            | Vietnam        | Neolithic    | 2625  | M | 22.39 | 103.47 | McCull et al. (2018) doi: 10.1126/science.aat3628            | PCA, Admixture                                                                                                                                   |                                                       |
| Vt779.SG               | SEAsia_BA           | Vietnam        | Bronze Age   | 2247  | F | 19.81 | 105.79 | McCull et al. (2018) doi: 10.1126/science.aat3628            | PCA, Admixture                                                                                                                                   |                                                       |
| Vt781.SG               | SEAsia_BA           | Vietnam        | Bronze Age   | 2249  | F | 19.81 | 105.79 | McCull et al. (2018) doi: 10.1126/science.aat3628            | PCA, Admixture                                                                                                                                   |                                                       |
| Vt796.SG               | SEAsia_BA           | Vietnam        | Bronze Age   | 2172  | F | 19.81 | 105.79 | McCull et al. (2018) doi: 10.1126/science.aat3628            | PCA, Admixture                                                                                                                                   |                                                       |
| Vt808.SG               | SEAsia_BA           | Vietnam        | Bronze Age   | 2251  | F | 19.81 | 105.79 | McCull et al. (2018) doi: 10.1126/science.aat3628            | PCA, Admixture                                                                                                                                   |                                                       |
| Vt833.SG               | SEAsia_N            | Vietnam        | Neolithic    | 4149  | F | 19.81 | 105.79 | McCull et al. (2018) doi: 10.1126/science.aat3628            | PCA, Admixture                                                                                                                                   |                                                       |
| Vt880.SG               | SEAsia_N            | Vietnam        | Neolithic    | 4000  | F | 21.01 | 107.29 | McCull et al. (2018) doi: 10.1126/science.aat3628            | PCA, Admixture                                                                                                                                   |                                                       |
| WC1.SG                 | Zagros_N            | Iran           | Neolithic    | 9219  | M | 34.61 | 47.11  | Broushaki et al. (2016) doi: 10.1126/science.aaf7943         | PCA, Admixture, NNLS, Left-pop in qpWave and qpAdm, Left-pop in qpWave and qpAdm for Basal Eurasia, f4-Statistics, f4-Statistics for Neanderthal |                                                       |

**Table S3:** ‘Right’ populations used qpAdm for all the possible source combinations of N= (2..5)

| <b>SampleID</b>        | <b>Group ID</b>         | <b>Publication</b>                                   |
|------------------------|-------------------------|------------------------------------------------------|
| Bichon.SG              | CEurope_HG              | Jones et al. (2015) doi: 10.1038/ncomms9912          |
| DA38.SG                | CAsia_XiongNu_WE        | Damgaard et al. (2018) doi:10.1038/s41586-018-0094-2 |
| DA39.SG                | CAsia_XiongNu           | Damgaard et al. (2018) doi:10.1038/s41586-018-0094-2 |
| DA43.SG                | CAsia_XiongNu           | Damgaard et al. (2018) doi:10.1038/s41586-018-0094-2 |
| DA45.SG                | CAsia_XiongNu           | Damgaard et al. (2018) doi:10.1038/s41586-018-0094-2 |
| I0100                  | CEurope_LBK_EN          | Lipson et al. (2017) doi: 10.1038/nature24476        |
| I0103                  | CEurope_LN              | Mathieson et al. (2015) doi: 10.1038/nature16152     |
| I0112                  | CEurope_BellBeaker_BA   | Mathieson et al. (2015) doi: 10.1038/nature16152     |
| I1499                  | CEurope_MN              | Mathieson et al. (2015) doi: 10.1038/nature16152     |
| Kostenki14             | Russia_EUP              | Fu et al. (2016) doi: 10.1038/nature17993            |
| Loschbour_published.DG | Loschbour_HG/CEurope_HG | Lazaridis et al. (2014) doi: 10.1038/nature13673     |
| M63.SG                 | SAsia_Mebrak            | Jeong et al. (2016) doi: 10.1073/pnas.1520844113     |
| MA1.SG                 | Russia_HG               | Raghavan et al. (2013) doi: 10.1038/nature12736      |
| Ma555.SG               | SEAsia_Historical       | McColl et al. (2018) doi: 10.1126/science.aat3628    |
| Ma912.SG               | SEAsia_LN               | McColl et al. (2018) doi: 10.1126/science.aat3628    |
| mota.SG                | Mota_EN/EAfrica_EN      | Llorente et al. (2015) doi: 10.1126/science.aaf3945  |
| S10.SG                 | SAsia_Samdzong          | Jeong et al. (2016) doi: 10.1073/pnas.1520844113     |
| S35.SG                 | SAsia_Samdzong          | Jeong et al. (2016) doi: 10.1073/pnas.1520844113     |
| S41.SG                 | SAsia_Samdzong          | Jeong et al. (2016) doi: 10.1073/pnas.1520844113     |
| Stuttgart_published.DG | CEurope_LBK_EN          | Lazaridis et al. (2014) doi: 10.1038/nature13673     |
| Ust_Ishim_published.DG | Ust_Ishim/Russia_HG     | Fu et al. (2014) doi: 10.1038/nature13810            |
| Vestonice16            | CEurope_MUP             | Fu et al. (2016) doi: 10.1038/nature17993            |



**Table S4:** Right populations used qpAdm to search for traces of the basal Eurasian lineage in modern AP populations in the form (Test, Mota, Early hunter-gatherer)

| SampleID               | Group ID            | Publication                                     |
|------------------------|---------------------|-------------------------------------------------|
| Kostenki14             | Russia_EUP          | Fu et al. (2016) doi: 10.1038/nature17993       |
| Ust_Ishim_published.DG | Ust_Ishim/Russia_HG | Fu et al. (2014) doi: 10.1038/nature13810       |
| BR_Onge-2.DG           | Onge                | Mallick et al. (2016) doi: 10.1038/nature18964  |
| S_Han-1.DG             | Han                 | Mallick et al. (2016) doi: 10.1038/nature18964  |
| S_Papuan-14.DG         | Papuan              | Skoglund et al. (2015) doi: 10.1038/nature14895 |

**Table S5:** Mixture proportions on AP and Iran populations inferred by *qpAdm* as a combination of four ancient sources

| Target        | Pop1         | Pop2        | Pop3           | Pop4           | dof | chisq | tail    | Prob.Pop1 | Prob.Pop2 | Prob.Pop3 | Prob.Pop4 | Feasible | SE.Pop1 | SE.Pop2 | SE.Pop3 | SE.Pop4 |
|---------------|--------------|-------------|----------------|----------------|-----|-------|---------|-----------|-----------|-----------|-----------|----------|---------|---------|---------|---------|
| M_Yemen       | Caucasus_HG  | Zagros_N    | Iberomaurusian | Natufian       | 7   | 10.36 | 0.16888 | 0.105     | 0.105     | 0.12      | 0.67      | Yes      | 0.85    | 0.664   | 0.284   | 0.475   |
| M_Yemen       | Caucasus_HG  | Levant_EBA  | Levant_PPN     | Iberomaurusian | 7   | 5.748 | 0.56951 | 0.06      | 0.625     | 0.03      | 0.285     | Yes      | 0.205   | 0.411   | 0.241   | 0.038   |
| M_Iran        | Caucasus_EBA | Caucasus_HG | Zagros_N       | Iberomaurusian | 7   | 11.31 | 0.12577 | 0.413     | 0.286     | 0.179     | 0.123     | Yes      | 1.038   | 1.621   | 0.657   | 0.076   |
| M_Iran        | Caucasus_HG  | Zagros_N    | Levant_PPN     | Iberomaurusian | 7   | 3.126 | 0.87308 | 0.458     | 0.358     | 0.157     | 0.027     | Yes      | 0.215   | 0.216   | 0.062   | 0.06    |
| M_Iran        | Caucasus_HG  | Zagros_N    | Levant_EBA     | Iberomaurusian | 7   | 4.858 | 0.67735 | 0.593     | 0.164     | 0.151     | 0.092     | Yes      | 0.17    | 0.162   | 0.08    | 0.051   |
| M_Iran        | Caucasus_HG  | Zagros_N    | Iberomaurusian | Natufian       | 7   | 5.025 | 0.65685 | 0.519     | 0.246     | 0.039     | 0.196     | Yes      | 0.238   | 0.209   | 0.091   | 0.135   |
| M_UAE         | Caucasus_EBA | Caucasus_HG | Zagros_N       | Iberomaurusian | 7   | 9.024 | 0.25093 | 0.393     | 0.104     | 0.217     | 0.287     | Yes      | 0.312   | 0.497   | 0.232   | 0.049   |
| M_UAE         | Caucasus_HG  | Zagros_N    | Levant_EBA     | Iberomaurusian | 7   | 5.567 | 0.59109 | 0.437     | 0.173     | 0.141     | 0.249     | Yes      | 0.158   | 0.153   | 0.07    | 0.047   |
| M_UAE         | Caucasus_HG  | Zagros_N    | Levant_PPN     | Iberomaurusian | 7   | 4.513 | 0.71914 | 0.329     | 0.344     | 0.13      | 0.198     | Yes      | 0.236   | 0.233   | 0.065   | 0.061   |
| M_UAE         | Caucasus_HG  | Zagros_N    | Iberomaurusian | Natufian       | 7   | 3.593 | 0.82531 | 0.472     | 0.175     | 0.235     | 0.118     | Yes      | 0.168   | 0.151   | 0.067   | 0.101   |
| M_Oman        | Caucasus_HG  | Zagros_N    | Levant_PPN     | Iberomaurusian | 7   | 5.712 | 0.57374 | 0.181     | 0.417     | 0.214     | 0.188     | Yes      | 0.251   | 0.253   | 0.065   | 0.066   |
| M_Oman        | Caucasus_HG  | Zagros_N    | Levant_EBA     | Iberomaurusian | 7   | 7.293 | 0.39898 | 0.296     | 0.171     | 0.265     | 0.268     | Yes      | 0.177   | 0.167   | 0.072   | 0.049   |
| M_Oman        | Caucasus_HG  | Zagros_N    | Iberomaurusian | Natufian       | 7   | 5.556 | 0.59242 | 0.371     | 0.198     | 0.215     | 0.216     | Yes      | 0.208   | 0.181   | 0.077   | 0.118   |
| M_SaudiArabia | Caucasus_EBA | Zagros_N    | Levant_PPN     | Iberomaurusian | 7   | 4.271 | 0.74807 | 0.359     | 0.118     | 0.34      | 0.183     | Yes      | 0.394   | 0.333   | 0.19    | 0.128   |

|               |             |            |                |                |   |       |         |       |       |       |       |     |       |       |       |       |
|---------------|-------------|------------|----------------|----------------|---|-------|---------|-------|-------|-------|-------|-----|-------|-------|-------|-------|
| M_SaudiArabia | Caucasus_HG | Zagros_N   | Levant_PPN     | Iberomaurusian | 7 | 4.441 | 0.7278  | 0.1   | 0.35  | 0.468 | 0.082 | Yes | 0.223 | 0.229 | 0.062 | 0.066 |
| M_SaudiArabia | Caucasus_HG | Zagros_N   | Iberomaurusian | Natufian       | 7 | 6.984 | 0.43059 | 0.169 | 0.127 | 0.034 | 0.67  | Yes | 0.306 | 0.251 | 0.111 | 0.178 |
| M_SaudiArabia | Caucasus_HG | Levant_EBA | Levant_PPN     | Iberomaurusian | 7 | 5.335 | 0.6191  | 0.229 | 0.451 | 0.129 | 0.191 | Yes | 0.163 | 0.33  | 0.197 | 0.032 |
| M_SaudiArabia | Zagros_N    | Levant_EBA | Levant_PPN     | Iberomaurusian | 7 | 5.828 | 0.56002 | 0.268 | 0.338 | 0.27  | 0.123 | Yes | 7.816 | 14.98 | 9.988 | 2.825 |
| M_SaudiArabia | Zagros_N    | Levant_EBA | Levant_PPN     | Natufian       | 7 | 3.211 | 0.86482 | 0.267 | 0.072 | 0.132 | 0.53  | Yes | 0.106 | 0.187 | 0.267 | 0.321 |



|                |                |            |              |             |                  |                  |                  |                 |                |                |                |  |  |  |  |  |  |  |
|----------------|----------------|------------|--------------|-------------|------------------|------------------|------------------|-----------------|----------------|----------------|----------------|--|--|--|--|--|--|--|
| Levant_PPN     |                | 9          | 6.158        | 0.7240      | 0.513            | 0.49             | Yes              | 0.036           | 0.036          |                |                |  |  |  |  |  |  |  |
| Natufian       |                | 9          | 7.382        | 0.5975      | 0.239            | 0.76             | Yes              | 0.072           | 0.072          |                |                |  |  |  |  |  |  |  |
| Iberomaurusian |                | 9          | 7.874        | 0.5469      | 0.781            | 0.22             | Yes              | 0.032           | 0.032          |                |                |  |  |  |  |  |  |  |
| Natufian       |                | 9          | 13.769       | 0.1308      | 0.069            | 0.93             | Yes              | 0.059           | 0.059          |                |                |  |  |  |  |  |  |  |
| <b>Pop2</b>    | <b>Pop3</b>    | <b>dof</b> | <b>chisq</b> | <b>tail</b> | <b>Prob.Pop1</b> | <b>Prob.Pop2</b> | <b>Prob.Pop3</b> | <b>Feasible</b> | <b>SE.Pop1</b> | <b>SE.Pop2</b> | <b>SE.Pop3</b> |  |  |  |  |  |  |  |
| Caucasus_HG    | Iberomaurusian | 8          | 12.454       | 0.1321      | 0.22             | 0.459            | 0.324            | Yes             | 1.384          | 1.54           | 0.2            |  |  |  |  |  |  |  |
| Zagros_N       | Iberomaurusian | 8          | 9.055        | 0.3377      | 0.46             | 0.257            | 0.285            | Yes             | 0.078          | 0.12           | 0.1            |  |  |  |  |  |  |  |
| Zagros_N       | Iberomaurusian | 8          | 9.542        | ####        | 0.64             | 0.105            | 0.253            | Yes             | 0.137          | 0.18           | 0.1            |  |  |  |  |  |  |  |
| Levant_EBA     | Iberomaurusian | 8          | 7.149        | 0.5207      | 0.6              | 0.11             | 0.292            | Yes             | 0.096          | 0.08           | 0              |  |  |  |  |  |  |  |
| Levant_PPN     | Iberomaurusian | 8          | 7.288        | 0.5059      | 0.67             | 0.053            | 0.281            | Yes             | 0.063          | 0.05           | 0              |  |  |  |  |  |  |  |
| Iberomaurusian | Natufian       | 8          | 5.144        | 0.7421      | 0.65             | 0.3              | 0.05             | Yes             | 0.099          | 0.04           | 0.1            |  |  |  |  |  |  |  |
| Levant_EBA     | Iberomaurusian | 8          | 14.763       | ####        | 0.54             | 0.295            | 0.169            | Yes             | 0.111          | 0.07           | 0.1            |  |  |  |  |  |  |  |
| Levant_PPN     | Iberomaurusian | 8          | 7.804        | 0.4529      | 0.66             | 0.21             | 0.129            | Yes             | 0.065          | 0.04           | 0              |  |  |  |  |  |  |  |
| Iberomaurusian | Natufian       | 8          | 12.098       | 0.1469      | 0.57             | 0.079            | 0.356            | Yes             | 0.093          | 0.05           | 0.1            |  |  |  |  |  |  |  |
| Caucasus_HG    | Iberomaurusian | 8          | 12.914       | 0.1149      | 0.22             | 0.631            | 0.152            | Yes             | 0.464          | 0.51           | 0.1            |  |  |  |  |  |  |  |
| Zagros_N       | Levant_PPN     | 8          | 8.062        | 0.4274      | 0.2              | 0.609            | 0.191            | Yes             | 0.176          | 0.09           | 0.1            |  |  |  |  |  |  |  |
| Zagros_N       | Iberomaurusian | 8          | 11.333       | 0.1835      | 0.59             | 0.293            | 0.115            | Yes             | 0.099          | 0.15           | 0.1            |  |  |  |  |  |  |  |
| Zagros_N       | Natufian       | 8          | 15.027       | 0.0586      | 0.1              | 0.497            | 0.404            | Yes             | 0.279          | 0.13           | 0.2            |  |  |  |  |  |  |  |
| Zagros_N       | Levant_EBA     | 8          | 7.693        | ####        | 0.5              | 0.356            | 0.147            | Yes             | 0.165          | 0.1            | 0.1            |  |  |  |  |  |  |  |
| Zagros_N       | Levant_PPN     | 8          | 2.598        | 0.9570      | 0.39             | 0.442            | 0.173            | Yes             | 0.134          | 0.1            | 0              |  |  |  |  |  |  |  |
| Zagros_N       | Iberomaurusian | 8          | 8.981        | ####        | 0.83             | 0.075            | 0.093            | Yes             | 0.15           | 0.2            | 0.1            |  |  |  |  |  |  |  |
| Zagros_N       | Natufian       | 8          | 5.183        | 0.7379      | 0.44             | 0.322            | 0.234            | Yes             | 0.126          | 0.09           | 0.1            |  |  |  |  |  |  |  |
| Levant_EBA     | Iberomaurusian | 8          | 5.884        | ####        | 0.75             | 0.12             | 0.132            | Yes             | 0.104          | 0.09           | 0              |  |  |  |  |  |  |  |
| Levant_PPN     | Iberomaurusian | 8          | 6.138        | 0.6318      | 0.81             | 0.08             | 0.114            | Yes             | 0.07           | 0.06           | 0              |  |  |  |  |  |  |  |
| Iberomaurusian | Natufian       | 8          | 7.216        | 0.5135      | 0.78             | 0.133            | 0.088            | Yes             | 0.117          | 0.05           | 0.1            |  |  |  |  |  |  |  |
| Zagros_N       | Iberomaurusian | 8          | 8.337        | 0.4013      | 0.55             | 0.11             | 0.336            | Yes             | 0.081          | 0.12           | 0.1            |  |  |  |  |  |  |  |
| Levant_EBA     | Iberomaurusian | 8          | 9.004        | ####        | 0.46             | 0.234            | 0.311            | Yes             | 0.091          | 0.08           | 0              |  |  |  |  |  |  |  |
| Levant_PPN     | Iberomaurusian | 8          | 9.841        | 0.2764      | 0.59             | 0.12             | 0.289            | Yes             | 0.061          | 0.05           | 0              |  |  |  |  |  |  |  |
| Iberomaurusian | Natufian       | 8          | 7.456        | ####        | 0.58             | 0.29             | 0.131            | Yes             | 0.104          | 0.04           | 0.1            |  |  |  |  |  |  |  |

|                |                |             |                |            |              |             |                  |                  |                  |                  |                  |                 |                |                |                |                |                |
|----------------|----------------|-------------|----------------|------------|--------------|-------------|------------------|------------------|------------------|------------------|------------------|-----------------|----------------|----------------|----------------|----------------|----------------|
| Levant_EBA     | Iberomaurusian | 8           | 11.024         | ####       | 0.41         | 0.374       | 0.218            | Yes              | 0.087            | 0.06             | 0                |                 |                |                |                |                |                |
| Levant_PPN     | Iberomaurusian | 8           | 6.568          | 0.5839     | 0.59         | 0.257       | 0.151            | Yes              | 0.061            | 0.04             | 0                |                 |                |                |                |                |                |
| Iberomaurusian | Natufian       | 8           | 10.142         | 0.2552     | 0.5          | 0.097       | 0.408            | Yes              | 0.088            | 0.05             | 0.1              |                 |                |                |                |                |                |
| Levant_EBA     | Iberomaurusian | 8           | 6.486          | 0.5929     | 0.2          | 0.594       | 0.206            | Yes              | 0.275            | 0.28             | 0                |                 |                |                |                |                |                |
| Levant_PPN     | Iberomaurusian | 8           | 4.669          | 0.7923     | 0.49         | 0.281       | 0.228            | Yes              | 0.074            | 0.06             | 0                |                 |                |                |                |                |                |
| Iberomaurusian | Natufian       | 8           | 10.638         | 0.2231     | 0.29         | 0.112       | 0.594            | Yes              | 0.198            | 0.05             | 0.2              |                 |                |                |                |                |                |
| Zagros_N       | Natufian       | 8           | 6.869          | 0.5508     | 0.1          | 0.193       | 0.706            | Yes              | 0.155            | 0.1              | 0.1              |                 |                |                |                |                |                |
| Levant_EBA     | Iberomaurusian | 8           | 4.87           | 0.7714     | 0.19         | 0.62        | 0.191            | Yes              | 0.096            | 0.09             | 0                |                 |                |                |                |                |                |
| Levant_PPN     | Iberomaurusian | 8           | 8.786          | 0.3607     | 0.43         | 0.399       | 0.17             | Yes              | 0.053            | 0.04             | 0                |                 |                |                |                |                |                |
| Iberomaurusian | Natufian       | 8           | 7.681          | 0.4652     | 0.3          | 0.082       | 0.622            | Yes              | 0.107            | 0.04             | 0.1              |                 |                |                |                |                |                |
| Levant_EBA     | Iberomaurusian | 8           | 6.931          | 0.5441     | 0.09         | 0.728       | 0.179            | Yes              | 0.096            | 0.06             | 0.1              |                 |                |                |                |                |                |
| Levant_EBA     | Natufian       | 8           | 4.067          | 0.8510     | 0.23         | 0.014       | 0.756            | Yes              | 0.067            | 0.25             | 0.3              |                 |                |                |                |                |                |
| Levant_PPN     | Iberomaurusian | 8           | 4.615          | 0.7978     | 0.45         | 0.494       | 0.06             | Yes              | 0.059            | 0.04             | 0                |                 |                |                |                |                |                |
| Levant_PPN     | Natufian       | 8           | 5.212          | 0.7347     | 0.35         | 0.298       | 0.348            | Yes              | 0.205            | 0.52             | 0.7              |                 |                |                |                |                |                |
| Levant_PPN     | Iberomaurusian | 8           | 9.129          | 0.3315     | 0.4          | 0.299       | 0.3              | Yes              | 0.084            | 0.07             | 0                |                 |                |                |                |                |                |
| Iberomaurusian | Natufian       | 8           | 12.208         | 0.1422     | 0.19         | 0.185       | 0.624            | Yes              | 0.215            | 0.05             | 0.2              |                 |                |                |                |                |                |
| Levant_EBA     | Iberomaurusian | 8           | 6.051          | 0.6415     | 0.09         | 0.632       | 0.279            | Yes              | 0.101            | 0.09             | 0                |                 |                |                |                |                |                |
| Levant_PPN     | Iberomaurusian | 8           | 14.895         | 0.0612     | 0.35         | 0.4         | 0.255            | Yes              | 0.056            | 0.04             | 0                |                 |                |                |                |                |                |
| Iberomaurusian | Natufian       | 8           | 10.653         | 0.2221     | 0.22         | 0.162       | 0.616            | Yes              | 0.117            | 0.04             | 0.1              |                 |                |                |                |                |                |
| Levant_EBA     | Iberomaurusian | 8           | 6.613          | 0.5789     | 0.03         | 0.691       | 0.279            | Yes              | 0.098            | 0.06             | 0.1              |                 |                |                |                |                |                |
| Levant_PPN     | Iberomaurusian | 8           | 9.229          | ####       | 0.37         | 0.47        | 0.159            | Yes              | 0.06             | 0.03             | 0                |                 |                |                |                |                |                |
| Iberomaurusian | Natufian       | 8           | 10.365         | ####       | 0.19         | 0.086       | 0.729            | Yes              | 0.093            | 0.06             | 0.1              |                 |                |                |                |                |                |
| <b>Pop2</b>    | <b>Pop3</b>    | <b>Pop4</b> | <b>Pop5</b>    | <b>dof</b> | <b>chisq</b> | <b>tail</b> | <b>Prob.Pop1</b> | <b>Prob.Pop2</b> | <b>Prob.Pop3</b> | <b>Prob.Pop4</b> | <b>Prob.Pop5</b> | <b>Feasible</b> | <b>SE.Pop1</b> | <b>SE.Pop2</b> | <b>SE.Pop3</b> | <b>SE.Pop4</b> | <b>SE.Pop5</b> |
| Zagros_N       | Levant_EBA     | Levant_PPN  | Iberomaurusian | 6          | 3.01         | 0.8074      | 0.531            | 0.236            | 0.107            | 0.06             | 0.1              | Yes             | 0.197          | 0.374          | 0.46           | 0.34           | 0.116          |
| Zagros_N       | Levant_EBA     | Levant_PPN  | Iberomaurusian | 6          | 4.76         | 0.5748      | 0.149            | 0.143            | 0.32             | 0.24             | 0.1              | Yes             | 0.215          | 0.434          | 0.585          | 0.428          | 0.142          |

**Table S7:** CP/NNLS - Weighted jackknife bootstraps for overall by country – limiting to the four sources identified in the qpAdm results

|              | Caucasus_HG | Caucasus_HG-SE | Iberomaurusian | Iberomaurusian-SE | Natufians | Natufians-SE | Zagros_N | Zagros_N-SE |
|--------------|-------------|----------------|----------------|-------------------|-----------|--------------|----------|-------------|
| Iran         | 0.49796     | 0.03972        | 0.11231        | 0.01412           | 0.17329   | 0.02679      | 0.21644  | 0.03381     |
| UAE          | 0.30593     | 0.02787        | 0.28737        | 0.01379           | 0.12553   | 0.02590      | 0.28117  | 0.02623     |
| Oman         | 0.27965     | 0.02317        | 0.26628        | 0.01338           | 0.21558   | 0.02277      | 0.23849  | 0.02582     |
| Saudi Arabia | 0.16309     | 0.02724        | 0.04043        | 0.01533           | 0.64661   | 0.02718      | 0.14988  | 0.04124     |
| Yemen        | 0.24566     | 0.03173        | 0.15767        | 0.01330           | 0.52793   | 0.02437      | 0.06874  | 0.04289     |

**Table S8:** CP/NNLS - Weighted jackknife bootstraps for overall by Cluster – limiting to the four sources identified in the qpAdm results

|           | Caucasus_HG | Caucasus_HG-SE | Iberomaurusian | Iberomaurusian-SE | Natufians | Natufians-SE | Zagros_N  | Zagros_N-SE |
|-----------|-------------|----------------|----------------|-------------------|-----------|--------------|-----------|-------------|
| Cluster A | 0.366975412 | 0.03824062     | 0.59111635     | 0.011239602       | 0.0017743 | 0.0107156    | 0.040134  | 0.0383911   |
| Cluster B | 0.586148121 | 0.02661906     | 0              | 0                 | 0.4138519 | 0.0266191    | 0         | 0           |
| Cluster C | 0.497906598 | 0.02312623     | 0.073116912    | 0.01555024        | 0.4289765 | 0.0274358    | 0         | 0           |
| Cluster D | 0.615670938 | 0.126787578    | 0.19664222     | 0.018059174       | 0         | 0            | 0.1876868 | 0.1395406   |
| Cluster E | 0.789207075 | 0.024338345    | 0              | 0                 | 0.2107929 | 0.0243383    | 0         | 0           |
| Cluster F | 0.181632249 | 0.079475129    | 0              | 0                 | 0.7167268 | 0.0238446    | 0.1016409 | 0.0776371   |

**Table S9:** Neanderthal introgression measured through the  $f_4(\text{Test, Mbuti; Altai, Denisovan})$  test

| Pop1_W         | Pop2_X | Pop3_Y | Pop4_Z   | $f_4$<br>statistic | SD       | Z     |
|----------------|--------|--------|----------|--------------------|----------|-------|
| M_Armenia      | Mbuti  | Altai  | Denisova | 0.00107            | 0.000305 | 3.506 |
| M_Bedouin      | Mbuti  | Altai  | Denisova | 0.001042           | 0.000293 | 3.55  |
| M_Druze_Israel | Mbuti  | Altai  | Denisova | 0.001065           | 0.000298 | 3.567 |
| M_Finland      | Mbuti  | Altai  | Denisova | 0.001253           | 0.000306 | 4.095 |
| M_France       | Mbuti  | Altai  | Denisova | 0.001239           | 0.000308 | 4.021 |
| M_Georgia      | Mbuti  | Altai  | Denisova | 0.001144           | 0.000305 | 3.755 |
| M_Iran         | Mbuti  | Altai  | Denisova | 0.000987           | 0.000293 | 3.367 |
| M_Italy        | Mbuti  | Altai  | Denisova | 0.001222           | 0.000303 | 4.038 |
| M_Jordan       | Mbuti  | Altai  | Denisova | 0.001027           | 0.000296 | 3.469 |
| M_Lebanon      | Mbuti  | Altai  | Denisova | 0.000965           | 0.000308 | 3.134 |
| M_Lezgins      | Mbuti  | Altai  | Denisova | 0.001187           | 0.000305 | 3.896 |
| M_Oman         | Mbuti  | Altai  | Denisova | 0.000902           | 0.000287 | 3.138 |
| M_Romania      | Mbuti  | Altai  | Denisova | 0.001238           | 0.000303 | 4.087 |
| M_SaudiArabia  | Mbuti  | Altai  | Denisova | 0.000968           | 0.000292 | 3.319 |
| M_Spain        | Mbuti  | Altai  | Denisova | 0.001256           | 0.0003   | 4.186 |
| M_Syria        | Mbuti  | Altai  | Denisova | 0.001028           | 0.000301 | 3.41  |
| M_Turkey       | Mbuti  | Altai  | Denisova | 0.001122           | 0.000303 | 3.707 |
| M_UAE          | Mbuti  | Altai  | Denisova | 0.000952           | 0.000287 | 3.315 |
| M_UK           | Mbuti  | Altai  | Denisova | 0.001269           | 0.000307 | 4.131 |
| M_Yemen        | Mbuti  | Altai  | Denisova | 0.000953           | 0.000289 | 3.292 |
| Kotias_HG      | Mbuti  | Altai  | Denisova | 0.000878           | 0.000409 | 2.146 |
| Loschbour      | Mbuti  | Altai  | Denisova | 0.00105            | 0.00038  | 2.765 |
| Iberomaurusian | Mbuti  | Altai  | Denisova | 0.000645           | 0.000441 | 1.463 |
| Natufian       | Mbuti  | Altai  | Denisova | 0.000798           | 0.000641 | 1.244 |
| Satsurbliia_HG | Mbuti  | Altai  | Denisova | 0.001473           | 0.000469 | 3.142 |
| Zagros_N       | Mbuti  | Altai  | Denisova | 0.000737           | 0.000398 | 1.851 |
| Cluster_A      | Mbuti  | Altai  | Denisova | 0.000775           | 0.000277 | 2.793 |
| Cluster_D      | Mbuti  | Altai  | Denisova | 0.000946           | 0.000295 | 3.206 |
| Cluster_F      | Mbuti  | Altai  | Denisova | 0.001008           | 0.000293 | 3.439 |

**Table S10: *qpAdm* in the form (Test, Mota, early hunter-gatherer)**

| Test           | Mota_EN | NWRussia_HG | dof | chisq  | tail   | Prob. Mota_EN | Prob. NWRussia_HG | Feasible | SE. Mota_EN | SE. NWRussia_HG |
|----------------|---------|-------------|-----|--------|--------|---------------|-------------------|----------|-------------|-----------------|
| M_Armenia      | Mota_EN | NWRussia_HG | 3   | 5.35   | 0.1479 | 0.26          | 0.74              | Yes      | 0.069       | 0.069           |
| M_Bedouin      | Mota_EN | NWRussia_HG | 3   | 4.051  | 0.2560 | 0.322         | 0.678             | Yes      | 0.063       | 0.063           |
| M_Druze        | Mota_EN | NWRussia_HG | 3   | 3.009  | 0.3902 | 0.268         | 0.732             | Yes      | 0.067       | 0.067           |
| M_Dubai        | Mota_EN | NWRussia_HG | 3   | 5.081  | 0.1660 | 0.447         | 0.553             | Yes      | 0.06        | 0.06            |
| M_France       | Mota_EN | NWRussia_HG | 3   | 7.066  | 0.0698 | 0.154         | 0.846             | Yes      | 0.074       | 0.074           |
| M_Georgia      | Mota_EN | NWRussia_HG | 3   | 3.432  | 0.3297 | 0.259         | 0.741             | Yes      | 0.066       | 0.066           |
| M_Iran         | Mota_EN | NWRussia_HG | 3   | 6.806  | 0.0783 | 0.371         | 0.629             | Yes      | 0.066       | 0.066           |
| M_Italy        | Mota_EN | NWRussia_HG | 3   | 4.477  | 0.2144 | 0.184         | 0.816             | Yes      | 0.07        | 0.07            |
| M_Jordan       | Mota_EN | NWRussia_HG | 3   | 4.403  | 0.2211 | 0.334         | 0.666             | Yes      | 0.064       | 0.064           |
| M_Lezgins      | Mota_EN | NWRussia_HG | 3   | 6.343  | 0.0960 | 0.214         | 0.786             | Yes      | 0.071       | 0.071           |
| M_Lebanon      | Mota_EN | NWRussia_HG | 3   | 4.62   | 0.2018 | 0.32          | 0.68              | Yes      | 0.069       | 0.069           |
| M_Oman         | Mota_EN | NWRussia_HG | 3   | 3.003  | 0.3912 | 0.455         | 0.545             | Yes      | 0.058       | 0.058           |
| M_Palestina    | Mota_EN | NWRussia_HG | 3   | 2.764  | 0.4295 | 0.332         | 0.668             | Yes      | 0.062       | 0.062           |
| M_Romania      | Mota_EN | NWRussia_HG | 3   | 3.512  | 0.3192 | 0.203         | 0.797             | Yes      | 0.067       | 0.067           |
| M_SaudiArabia  | Mota_EN | NWRussia_HG | 3   | 2.641  | 0.4503 | 0.366         | 0.634             | Yes      | 0.061       | 0.061           |
| M_Spain        | Mota_EN | NWRussia_HG | 3   | 6.649  | 0.0840 | 0.158         | 0.842             | Yes      | 0.072       | 0.072           |
| M_Syria        | Mota_EN | NWRussia_HG | 3   | 2.963  | 0.3974 | 0.31          | 0.69              | Yes      | 0.065       | 0.065           |
| M_UK           | Mota_EN | NWRussia_HG | 3   | 4.553  | 0.2076 | 0.15          | 0.85              | Yes      | 0.069       | 0.069           |
| M_Yemen        | Mota_EN | NWRussia_HG | 3   | 2.06   | 0.5601 | 0.39          | 0.61              | Yes      | 0.058       | 0.058           |
| Kotias_HG      | Mota_EN | NWRussia_HG | 3   | 2.689  | 0.4421 | 0.389         | 0.611             | Yes      | 0.093       | 0.093           |
| Natufian       | Mota_EN | NWRussia_HG | 3   | 3.92   | 0.2702 | 0.231         | 0.769             | Yes      | 0.152       | 0.152           |
| Zagros_N       | Mota_EN | NWRussia_HG | 3   | 0.223  | 0.9739 | 0.484         | 0.516             | Yes      | 0.087       | 0.087           |
| Satsurbli_HG   | Mota_EN | NWRussia_HG | 3   | 1.595  | 0.6605 | 0.399         | 0.601             | Yes      | 0.106       | 0.106           |
| Iberomaurusian | Mota_EN | NWRussia_HG | 3   | 11.054 | 0.0114 | 0.602         | 0.398             | Yes      | 0.104       | 0.104           |
| Cluster_F      | Mota_EN | NWRussia_HG | 3   | 2.883  | 0.4100 | 0.349         | 0.651             | Yes      | 0.061       | 0.061           |
| Cluster_A      | Mota_EN | NWRussia_HG | 3   | 3.177  | 0.3651 | 0.491         | 0.509             | Yes      | 0.055       | 0.055           |
| Cluster_D      | Mota_EN | NWRussia_HG | 3   | 17.712 | 0.0005 | 0.454         | 0.546             | Yes      | 0.081       | 0.081           |
